# Supplementary material for: Protocol of an interdisciplinary consensus project aiming to develop an AGREE II extension for guidelines in surgery
Source: PubMed Central journal article supplement — BMJ Open. 2020 Aug 11;10(8):e037107. doi: 10.1136/bmjopen-2020-037107 (PMC7418673; doi:10.1136/bmjopen-2020-037107), 2020-08-11
Supplement: bmjopen-2020-037107.draft_revisions.pdf [file bmjopen-2020-037107.draft_revisions.pdf]

# BMJ Open

BMJ Open is committed to open peer review. As part of this commitment we make the peer review history of every article we publish publicly available.

When an article is published we post the peer reviewers' comments and the authors' responses online. We also post the versions of the paper that were used during peer review. These are the versions that the peer review comments apply to.

The versions of the paper that follow are the versions that were submitted during the peer review process. They are not the versions of record or the final published versions. They should not be cited or distributed as the published version of this manuscript.

BMJ Open is an open access journal and the full, final, typeset and author-corrected version of record of the manuscript is available on our site with no access controls, subscription charges or pay-per-view fees (<http://bmjopen.bmj.com>).

If you have any questions on BMJ Open's open peer review process please email [info.bmjopen@bmj.com](mailto:info.bmjopen@bmj.com)

# BMJ Open

## Project Protocol for AGREE II Extension for Guidelines in Surgery

|                               |                                                                                                                                                                                                                                                                                                                                                                                                                                              |
|-------------------------------|----------------------------------------------------------------------------------------------------------------------------------------------------------------------------------------------------------------------------------------------------------------------------------------------------------------------------------------------------------------------------------------------------------------------------------------------|
| Journal:                      | <i>BMJ Open</i>                                                                                                                                                                                                                                                                                                                                                                                                                              |
| Manuscript ID                 | bmjopen-2020-037107                                                                                                                                                                                                                                                                                                                                                                                                                          |
| Article Type:                 | Protocol                                                                                                                                                                                                                                                                                                                                                                                                                                     |
| Date Submitted by the Author: | 18-Jan-2020                                                                                                                                                                                                                                                                                                                                                                                                                                  |
| Complete List of Authors:     | Antoniou, George A.; Royal Oldham Hospital, Department of Vascular & Endovascular Surgery; The University of Manchester<br>Mavridis, Dimitri; University of Ioannina, Department of Primary Education; Universite Paris Descartes Faculte de Medecine, Sorbone Paris Cité<br>Tsokani, Sofia<br>Lopez-Cano, Manuel<br>Florez, Ivan<br>Brouwers, Melissa<br>Markar, Sheraz R.<br>Silecchia , Gianfranco<br>Francis, Nader<br>Antoniou, Stavros |
| Keywords:                     | SURGERY, Protocols & guidelines < HEALTH SERVICES ADMINISTRATION & MANAGEMENT, Quality in health care < HEALTH SERVICES ADMINISTRATION & MANAGEMENT                                                                                                                                                                                                                                                                                          |
|                               |                                                                                                                                                                                                                                                                                                                                                                                                                                              |

SCHOLARONE™  
Manuscripts

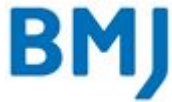

I, the Submitting Author has the right to grant and does grant on behalf of all authors of the Work (as defined in the below author licence), an exclusive licence and/or a non-exclusive licence for contributions from authors who are: i) UK Crown employees; ii) where BMJ has agreed a CC-BY licence shall apply, and/or iii) in accordance with the terms applicable for US Federal Government officers or employees acting as part of their official duties; on a worldwide, perpetual, irrevocable, royalty-free basis to BMJ Publishing Group Ltd ("BMJ") its licensees and where the relevant Journal is co-owned by BMJ to the co-owners of the Journal, to publish the Work in this journal and any other BMJ products and to exploit all rights, as set out in our [licence](#).

The Submitting Author accepts and understands that any supply made under these terms is made by BMJ to the Submitting Author unless you are acting as an employee on behalf of your employer or a postgraduate student of an affiliated institution which is paying any applicable article publishing charge ("APC") for Open Access articles. Where the Submitting Author wishes to make the Work available on an Open Access basis (and intends to pay the relevant APC), the terms of reuse of such Open Access shall be governed by a Creative Commons licence – details of these licences and which [Creative Commons](#) licence will apply to this Work are set out in our licence referred to above.

Other than as permitted in any relevant BMJ Author's Self Archiving Policies, I confirm this Work has not been accepted for publication elsewhere, is not being considered for publication elsewhere and does not duplicate material already published. I confirm all authors consent to publication of this Work and authorise the granting of this licence.



- 1  
2  
3 25 9. Department of Surgery, University Hospital "La Sapienza", Rome, Italy  
4  
5  
6 26 10. Department of General Surgery, Yeovil District Hospital NHS Foundation Trust,  
7  
8 27 Higher Kingston, Yeovil, United Kingdom  
9  
10  
11 28 11. Medical School, European University of Cyprus, Nicosia, Cyprus  
12  
13 29 12. Surgical Department, Mediterranean Hospital of Cyprus, Limassol, Cyprus  
14  
15  
16 30

17  
18 31 **Corresponding author**

19  
20 32 Mr. George A Antoniou MD PhD MSc FEBVS

21  
22  
23 33 **Address:** Surgical Offices, Phase 1, The Royal Oldham Hospital, Rochdale Road,  
24  
25 34 Oldham OL1 2JH, United Kingdom

26  
27  
28 35 **E-mail:** antoniou.ga@hotmail.com, Georgios.Antoniou@pat.nhs.uk  
29  
30  
31 36

32  
33 37 **Disclosures**

34  
35 38 The authors disclose no conflicts of interest.  
36  
37  
38 39

39  
40 40 **Funding**

41 41 This project received funding from the United European Gastroenterology and the  
42 42 European Association for Endoscopic Surgery. The funding bodies had no influence  
43 43 on the development of this protocol.  
44  
45  
46  
47  
48  
49  
50  
51  
52  
53  
54  
55  
56  
57  
58  
59  
60 48

1  
2  
3 49 **ABSTRACT**  
4  
5

6 50 **Introduction** AGREE II is an instrument that informs development, reporting and  
7  
8 51 assessment of clinical practice guidelines. Previous research has demonstrated the  
9  
10 52 need for improvement in methodological and reporting quality of clinical practice  
11  
12 53 guidelines specifically in surgery. We aim to develop an AGREE II extension  
13  
14 54 document for application in surgical guidelines.  
15  
16

17 55 **Methods and analysis** We have performed a structured literature review and  
18  
19 56 assessment of guidelines in surgery using the AGREE II instrument. In exploratory  
20  
21 57 analyses, we have identified factors associated with guideline quality. We have  
22  
23 58 performed reliability and factor analyses to inform the development of an extension  
24  
25 59 document. We will summarize this information and present it to a Delphi panel of  
26  
27 60 stakeholders. We will perform iterative Delphi rounds and we will summarize the  
28  
29 61 final results to develop the extension instrument in a dedicated consensus  
30  
31 62 conference.  
32  
33  
34  
35  
36

37 63 **Ethics and dissemination** Funding bodies will not be involved in the development of  
38  
39 64 the instrument. We will request board approval by Northern Care Alliance NHS  
40  
41 65 Group, UK. Conflicts of interest, if any, will be addressed by re-assigning functions or  
42  
43 66 replacing participants with relevant conflicts.  
44  
45  
46

47 67

48  
49 68 **KEYWORDS**  
50

51 69 AGREE II; clinical practice guideline; reporting quality; development; methodology;  
52  
53 70 EQUATOR Network  
54  
55

56 71

57 72  
58  
59  
60

1  
2  
3 73 **STRENGTHS AND LIMITATIONS**  
4

- 5  
6 74 • This is the first project to address guideline development and reporting in surgery.  
7  
8 75 • It will combine statistical considerations, conceptual parameters to be derived  
9  
10 76 from qualitative synthesis and a formal Delphi process.  
11  
12  
13 77 • It will involve a panel of stakeholders from a variety of scientific, cultural and  
14  
15 78 geographical backgrounds.  
16  
17  
18 79 • The project will not address specific disciplines of surgery.  
19

20 80

21 81

22 82

23 83

24 84

25 85

26 86

27 87

28 88

29 89

30 90

31 91

32 92

33 93

34 94

35 95

36 96

37  
38  
39  
40  
41  
42  
43  
44  
45  
46  
47  
48  
49  
50  
51  
52  
53  
54  
55  
56  
57  
58  
59  
60

## 97 INTRODUCTION

98 Research evidence is the primary source to inform medical practice forming the  
99 cornerstone of evidence-based medicine.<sup>1</sup> An average of 5,639 new articles were  
100 indexed per month under the subject heading 'Surgery' in the National Library of  
101 Medicine over the past decade.<sup>2</sup> Given this fact, keeping abreast of the latest  
102 evidence is a strenuous task for healthcare practitioners. Clinical practice guidelines  
103 evaluate, summarize and contextualize research evidence into actionable  
104 recommendations.<sup>3</sup> As such, guidelines have a direct impact on delivery of  
105 healthcare and surgical services. It is therefore of paramount importance to ensure  
106 the highest quality standards in developing and reporting guidelines.

107 A great amount of scientific endeavor in the past few years has focused on  
108 the quality of scholarly work, including clinical practice guidelines.<sup>4</sup> Reporting  
109 standards have been developed for virtually all study designs and have been  
110 summarized by the EQUATOR (Enhancing the QUALity and Transparency Of health  
111 Research) Network.<sup>5</sup> AGREE II (Appraisal of Guidelines for Research and Evaluation)  
112 constitutes a framework for developing, appraising and reporting clinical practice  
113 guidelines.<sup>6</sup> It is endorsed by major international and national agencies, including the  
114 World Health Organization and the National Institute for Health and Care Excellence  
115 (NICE) in the United Kingdom.<sup>7,8</sup> AGREE II is a generic tool that applies to all  
116 disciplines of medicine and no modification or extension of the framework has been  
117 proposed, described or developed for specific clinical branches such as surgery.

118 The tool is comprized of 23 items organized in 7 thematic domains: Scope  
119 and purpose, Stakeholder involvement, Rigor of development, Clarity of  
120 presentation, Applicability, and Editorial independence. It concludes with an overall



1  
2  
3 121 assessment and a statement of whether the guideline is considered of sufficient  
4  
5 122 quality to be used or recommended in clinical practice (**Appendix**).  
6  
7

8 123

9  
10 124 *The need for an AGREE II extension*

11  
12  
13 125 Our research group has acted as methodological and content coordinators of  
14  
15 126 landmark surgical guidelines and have served as members of surgical guideline  
16  
17 127 development groups.<sup>9,10,11,12,13,14</sup> Even though members of our group, in their role as  
18  
19 128 guideline developers, have made every effort to comply with the highest  
20  
21 129 methodological standards, as indicated by adherence to GRADE (Grading of  
22  
23 130 Recommendations Assessment, Development and Evaluation) and AGREE II  
24  
25 131 methodologies,<sup>15,16</sup> we noticed that compliance with all aspects of several  
26  
27 132 parameters of the AGREE II instrument was not possible. For example, the item “The  
28  
29 133 potential resource implications of applying the recommendations have been  
30  
31 134 considered” may be difficult to be universally addressed, because cost-effectiveness  
32  
33 135 studies are scarce in the surgical literature and relevant evidence typically varies in  
34  
35 136 different settings.<sup>17</sup> We have hypothesized that the original AGREE II document may  
36  
37 137 not be applicable to clinical practice guidelines in surgery, which often represent  
38  
39 138 complex and multifaceted interventions.  
40  
41  
42  
43  
44  
45  
46

47 139

48  
49 140 *Objective*

50  
51  
52 141 There are a few guideline reporting documents in other fields of medicine,<sup>18,19</sup>  
53  
54 142 however a scoping literature review by our group has not identified any document to  
55  
56 143 inform guideline development and reporting in the field of surgery. Our aim is to  
57  
58  
59  
60

1  
2  
3 144 develop an extension of the AGREE II instrument that is specific for surgery through  
4  
5 145 an evidence-informed and consensus-based approach.  
6  
7  
8 146

9  
10 147 **METHODS**  
11

12  
13 148 We have formed an international multi- and inter-disciplinary collaborative research  
14  
15 149 working group, that consists of surgeons, guideline developers, evidence synthesis  
16  
17 150 experts, GRADE methodologists,<sup>20</sup> biostatisticians and a lead member of the AGREE  
18  
19 151 collaboration. This is a tripartite project named *Guideline Assessment Project: Filling*  
20  
21 152 *the GAP in Surgical Guidelines*. A summary of the project is outlined in **Fig. 1**.  
22  
23

24  
25 153 This protocol complies with the Guidance for Developers of Health Research  
26  
27 154 Reporting Guidelines.<sup>21</sup>  
28  
29

30 155

31  
32 156 • *GAP I Project: Literature review and exploratory analyses*  
33

34  
35 157 We have previously performed a structured review to identify clinical practice  
36  
37 158 guidelines in the field of surgery published over a 10-year period.<sup>22</sup> We have  
38  
39 159 assessed the methodological and reporting quality of the selected guidelines using  
40  
41 160 the original AGREE II criteria. Domain scores (calculated by summing up all the scores  
42  
43 161 of the individual items in a domain and by scaling the total as a percentage of the  
44  
45 162 maximum possible score for that domain)<sup>16</sup> ranged between 0-56%, suggesting  
46  
47 163 generally inadequate and highly variable guideline quality. The median overall score  
48  
49 164 was 4 out of a maximum of 7, and 40% of guidelines were not considered suitable  
50  
51 165 for use based on their quality as assessed using the AGREE II instrument.  
52  
53  
54

55  
56  
57 166 In exploratory analyses, we have found guidelines produced by surgical  
58  
59 167 organizations with a high ( $\geq 1$  guideline per year) output (odds ratio 3.79, 95%  
60

1  
2  
3 168 confidence interval, 1.01–12.66) and those produced by surgical organizations with a  
4  
5 169 guideline committee (odds ratio 4.15, 95% confidence interval, 1.47–11.77) have  
6  
7  
8 170 higher odds of reaching sufficient quality and being recommended for use.<sup>22</sup>  
9

10  
11 171

12  
13 172 • *GAP II: Statistically calibrating the AGREE II instrument*  
14

15 173 The second part of this project was focused on statistical calibration of the AGREE II  
16  
17 174 instrument. We employed a series of statistical methods to explore reliability,  
18  
19 175 internal consistency and unidimensionality of the AGREE II instrument. We  
20  
21 176 investigated the internal consistency that refers to the extent to which all items of  
22  
23 177 the instrument measure the same hypothetical construct. We explored if and how  
24  
25 178 test items are intercorrelated. Large intercorrelations among test items are  
26  
27 179 indicative of the items measuring the same construct. Using reliability analysis,  
28  
29 180 Kendall's tau statistics, factor analysis and the item response theory, we explored  
30  
31 181 whether items of each AGREE II domain are intercorrelated and are, therefore,  
32  
33 182 indicators of the same construct. We have finally drafted a modified AGREE II  
34  
35 183 document for guidelines in surgery, on the basis of the outcomes of statistical  
36  
37 184 models.  
38  
39

40  
41  
42  
43  
44  
45 185

46  
47 186 • *GAP III: AGREE II Extension for Surgical Guidelines*  
48

49 187 The third part of the project aims to use the information from the previous GAP  
50  
51 188 projects and other published information on the topic to develop the extension  
52  
53 189 document using a structured Delphi process involving relevant stakeholders.  
54  
55

56  
57 190 The multidisciplinary Delphi panel will include surgical specialists, journal  
58  
59 191 editors, guideline development bodies, GRADE representatives, and patient  
60

1  
2  
3 192 representatives. Under consideration of the evidence, stakeholders will be asked to  
4  
5 193 provide their input through a Delphi process, which will inform the preparation of an  
6  
7  
8 194 AGREE II extension for surgical guidelines.  
9

10  
11 195

### 12 13 196 *Funding*

14  
15 197 This third part of the project is funded by United European Gastroenterology and the  
16  
17  
18 198 European Association for Endoscopic Surgery. The funding bodies did not have any  
19  
20 199 influence on the previous work and will not have influence on the upcoming process.  
21

22  
23 200

### 24 25 201 *Participants*

26  
27 202 The executive group consists of surgeons (MLC, SRM, GS, GAA, NKF, SAA), members  
28  
29  
30 203 of surgical quality and research boards (MLC, NKF, SAA), guideline developers (MLC,  
31  
32 204 IF, MB, GS, NKF, SAA), evidence synthesis experts (IF, GAA, DM, SAA), GRADE  
33  
34  
35 205 methodologists (MLC, SAA),<sup>20</sup> biostatisticians (DM, ST), and 2 leads of the AGREE  
36  
37 206 Group (IF, MB). It is further divided into 4 working groups with distinct functions and  
38  
39  
40 207 responsibilities:

- 41  
42 208 • The strategic steering group is responsible for overseeing the project.  
43  
44 209 • The methods group coordinates the methodology of the project.  
45  
46  
47 210 • The evidence review group will review the literature for evidence on candidate  
48  
49 211 new items to be included in the extension document.  
50  
51  
52 212 • The evidence synopsis group will summarize evidence for presentation to Delphi  
53  
54 213 participants.  
55  
56  
57  
58  
59  
60

1  
2  
3 214 The group attended a one-day meeting to discuss the findings of previous  
4  
5 215 work, define the methodology and study design, and identify potential stakeholder  
6  
7  
8 216 groups to comprise the Delphi panel.  
9

10 217

11  
12  
13 218 *Delphi process*

14  
15 219 The Delphi panel will consist of key stakeholders, including; representatives from  
16  
17 220 different surgical disciplines (general surgery, urology, thoracic surgery, vascular  
18  
19 221 surgery, pediatric surgery), guideline developers from different continents and  
20  
21 222 representatives of guideline development organizations. The public will be involved  
22  
23 223 by participation of patient representatives from the European Patients Forum (**Table**  
24  
25 224 **1**). We will develop a web-based survey tool to facilitate Delphi exercises. Findings of  
26  
27 225 previous work (GAP I and GAP II) and further evidence that will be identified through  
28  
29 226 a scoping literature review will be summarized and presented to Delphi participants.  
30  
31 227 Summary information will also be available on the project website at [https://gap-  
34  
35 229 project.org](https://gap-<br/>32<br/>33 228 project.org). Online links to full documents for detailed review of the evidence will be  
36  
37  
38  
39  
40  
41 provided.

42 230 The first round will include open-ended questions to identify candidate items  
43  
44 231 for inclusion in the extension document. Responses will be grouped and summarized  
45  
46 232 by the methods group before the second round is commenced.

47  
48  
49 233 The second round will include closed-ended questions in a numeric Likert  
50  
51 234 scale to assess participants' opinions and level of agreement on including candidate  
52  
53 235 items or excluding existing items from the extension document. Candidate items will  
54  
55 236 have been identified through GAP I and GAP II, and the scoping literature review. We  
56  
57 237 will discard low-scoring items and use the shortlisted items in a third Delphi round.  
58  
59  
60

1  
2  
3 238 We will repeat the process until new information reaches saturation and consensus  
4  
5  
6 239 with an alpha level of 0.8.  
7

8 240 The Delphi panel's contribution will be acknowledged by group authorship in  
9  
10 241 subsequent publications of the extension document, the elaboration document and  
11  
12  
13 242 supporting tools.  
14

15 243

16  
17  
18 244 *Qualitative synthesis*

19  
20 245 We will perform qualitative evidence synthesis to identify factors of conceptual  
21  
22  
23 246 importance to the quality of evidence in surgery. Furthermore, we will survey users  
24  
25 247 of social media to nominate parameters of importance in the development and  
26  
27  
28 248 reporting of guidelines in surgery, and will group and summarize their responses.  
29  
30 249 Evidence identified from the above pathways, along with information from GAP I and  
31  
32  
33 250 GAP II will be summarized and taken into account when developing the extension  
34  
35 251 document.  
36

37 252

38  
39  
40 253 *Consensus meeting*

41  
42 254 Following the Delphi process, the executive group will meet to discuss the findings  
43  
44  
45 255 and compose the first draft of the extension document. We will present new items  
46  
47 256 that will be identified through the Delphi exercise and the qualitative synthesis, and  
48  
49  
50 257 discuss their plausibility and possible inclusion in the instrument. Similarly, items to  
51  
52  
53 258 be excluded with the respective rationale will be discussed. The group will finalize  
54  
55 259 the extension document by ordering and allocating items into domains.

56  
57 260 The executive group will hold a further meeting with the advisory group that  
58  
59 261 is comprised of journal editors and representatives of surgical associations to discuss  
60

1  
2  
3 262 dissemination and implementation processes of the developed extension  
4  
5  
6 263 instrument.

7  
8 264

9  
10 265 *Pilot-testing and assessment of internal validity*

11  
12  
13 266 The extension instrument will be pilot-tested by 2 members of the executive group.

14  
15 267 One member will apply the instrument on the surgical guidelines which were

16  
17 268 identified by the structured search process as described in GAP I<sup>22</sup> and on additional

18  
19 269 guidelines that will be identified by extending the search to the present date. A

20  
21 270 second member will independently follow the same process in a randomly selected

22  
23 271 sample of 15 guidelines. The biostatistical team will assess the internal validity by

24  
25 272 applying the statistical models of GAP II. Any difficulties encountered with the use of

26  
27 273 the instrument will be documented and addressed. Results of the statistical

28  
29 274 assessment will be appraised against statistical findings of the appraisal of the

30  
31 275 original AGREE II instrument (GAP II).

32  
33 276

34  
35 277 *AGREE II Extension Statement*

36  
37 278 The extension statement along with an explanation and elaboration (E&E) document

38  
39 279 will be composed by the executive group. The E&E document will detail the use of

40  
41 280 the extension instrument in developing and reporting a new surgical guideline and

42  
43 281 appraising an existing surgical guideline.

44  
45 282

46  
47 283 *AGREE II Extension Checklist*

48  
49 284 A checklist including the AGREE II Extension items will be developed with the aim of

50  
51 285 this checklist to be used by guideline developers (to summarize development and

1  
2  
3 286 reporting parameters), guideline users (to appraise quality), peer reviewers and  
4  
5 287 journal editors (to assess adequacy of reporting parameters).<sup>23</sup>  
6  
7

8 288

9  
10 289 *Publication and dissemination strategy*

11  
12  
13 290 We will submit the final paper with the extension document to be considered for  
14  
15 291 publication in the UEG Journal and Surgical Endoscopy, as defined in the respective  
16  
17 292 pre-development agreements. We will negotiate simultaneous publications in other  
18  
19 293 surgical journals for widest dissemination as recommended by the Guidance for  
20  
21 294 Developers of Health Research Reporting Guidelines.<sup>21</sup>  
22  
23

24  
25 295 We will make the extension document available in a dedicated website with  
26  
27 296 links to the original publications. We will encourage surgical organizations with  
28  
29 297 guideline development activities to use the instrument. We will further pursue  
30  
31 298 dissemination through the websites of the funding bodies and channels of social  
32  
33 299 media of major stakeholders, such as the Guideline International Network, GRADE  
34  
35 300 and EQUATOR.  
36  
37

38  
39 301 Through direct contact, we will advise international surgical and guideline  
40  
41 302 development organizations, and policymakers to endorse the extension instrument.  
42  
43 303 Furthermore, editors of surgical journals will be advised to provide an extension  
44  
45 304 instrument checklist that authors of clinical practice guidelines should submit along  
46  
47 305 with the original manuscript.  
48  
49

50  
51 306

52  
53 307 *Feedback and criticism*

54  
55 308 We will invite constructive feedback on the instrument through the dedicated  
56  
57 309 website (<https://gap-project.org>) and we will consider comments in letters to the  
58  
59  
60



1  
2  
3 310 editor and via the social media. An ad hoc team will collect and summarize the  
4  
5 311 feedback received in 3-monthly intervals for the first year after publication, and the  
6  
7  
8 312 executive group will discuss and address this information in web-based meetings.  
9

10 313

11  
12  
13 314 *Monitoring, update and future steps*

14  
15 315 The executive group will monitor the use of the extension document and appraise its  
16  
17 316 applicability in surgical guidelines for a reasonable period of time after dissemination  
18  
19  
20 317 and will publish their findings. Following consideration of the outcomes, feedback,  
21  
22 318 criticism, suggestions and new evidence in the field, we will discuss the need for an  
23  
24 319 update. The development of further extension instruments for national surgical  
25  
26 320 guidelines and guidelines in distinct surgical or other interventional disciplines will be  
27  
28 321 considered following discussions with key stakeholders.  
29

30  
31  
32 322

33  
34  
35 323 **DISCUSSION**

36  
37 324 *Implications for practice and research*

38  
39 325 Clinical practice guidelines directly impact clinical practice and healthcare delivery  
40  
41 326 and, as such, development must follow rigorous methodological and reporting  
42  
43 327 standards. The AGREE II instrument has been designed as a generic tool for  
44  
45 328 development and appraisal of clinical practice guidelines.<sup>6</sup> It is not intended to  
46  
47 329 substitute established detailed guidance on guideline development principles,  
48  
49 330 processes and procedures, such as the GRADE approach.<sup>15</sup> It has addressed a vital  
50  
51 331 need to summarize and detail essential development steps and reporting  
52  
53 332 parameters for high quality guidelines. Furthermore, as an appraisal instrument, it  
54  
55  
56  
57  
58  
59  
60

1  
2  
3 333 may be used by healthcare practitioners, policymakers and other stakeholders to  
4  
5  
6 334 inform decisions regarding the use of an existing guideline.  
7

8 335 In addition, AGREE II has been shown to be a valuable tool for assessment of  
9  
10 336 guideline quality in several clinical disciplines and evidence  
11  
12 337 fields.<sup>22,24,25,26,27,28,29,30,31,32</sup> Such summaries alert the scientific community to the  
13  
14  
15 338 need for improving specific aspects of clinical practice guidelines (corresponding to  
16  
17 339 the instrument domains) or the overall quality of guidelines. Our previous research  
18  
19 340 has highlighted the need for improvement of the quality of surgical guidelines.<sup>22</sup> An  
20  
21 341 AGREE II extension for surgical guidelines is expected to meet this need.  
22  
23

24  
25 342 The outcome of this project will be the first AGREE II extension document.  
26  
27 343 RIGHT (Reporting Tool for Practice Guidelines in Health Care) is another reporting  
28  
29 344 instrument for clinical practice guidelines.<sup>33</sup> We are aware of a planned RIGHT  
30  
31 345 extension for public versions of guidelines and a RIGHT extension for adapted  
32  
33 346 practice guidelines.<sup>34,35</sup> An extension document of RIGHT for surgical guidelines  
34  
35 347 would be justified as well. However, in view of the evidenced gap in methodological  
36  
37 348 quality of surgical guidelines,<sup>22</sup> we considered more appropriate to elaborate on  
38  
39 349 AGREE II, as it addresses guideline development, reporting and appraisal.  
40  
41  
42  
43  
44

45 350

#### 46 47 351 *Strengths and limitations*

48  
49 352 This tripartite project is the first to employ statistical models to inform the validity of  
50  
51 353 an extension, modification or update document on guidelines reporting. We will  
52  
53 354 correlate statistical findings with conceptual considerations of the need for  
54  
55 355 adjustments/extension of the AGREE II instrument. The project methods group has  
56  
57 356 adopted recommendations on developing research reporting guidelines, proposed  
58  
59  
60

1  
2  
3 357 by a collaborative team who have developed a significant number of such  
4  
5  
6 358 guidelines.<sup>21</sup> The holistic approach to developing an extension document for clinical  
7  
8 359 practice guidelines in surgery is reflected in the diverse scientific, cultural and  
9  
10 360 geographical background of experts in the field involved in the project. Similarly, the  
11  
12 361 Delphi panel will include stakeholders and members from a variety of backgrounds  
13  
14 362 including clinicians/surgeons, methodologists, guideline developers, policy makers  
15  
16 363 and the public (patient representatives).  
17  
18  
19

20 364 A face-to-face meeting of Delphi participants, instead of a full web-based  
21  
22 365 Delphi process, might be more efficacious in developing the extension document  
23  
24 366 allowing direct exchange of opinions, information and ideas. We will encourage a full  
25  
26 367 participation and exchange of information by developing a user-friendly and  
27  
28 368 interaction-allowing web-based platform. Furthermore, we will incentivize  
29  
30 369 participation and engagement of potential Delphi members by proposing group  
31  
32 370 authorship and participation in future associated projects.  
33  
34  
35  
36

37 371

#### 38 372 *Research ethics*

39  
40 373 The executive group will seek Institutional Review Board approval by Northern Care  
41  
42 374 Alliance NHS Group, UK We will request electronic informed consent from Delphi  
43  
44 375 participants and the responses of the Delphi members will be anonymized.  
45  
46  
47  
48

49 376 We have obtained conflict of interest forms of all executive group members  
50  
51 377 and will request electronic and/or written informed consent by Delphi participants  
52  
53 378 and members of the advisory group. We will deal with potential conflicts of interest  
54  
55 379 by re-assigning functions or replacing participants who pose interest conflict.  
56  
57  
58

59 380  
60

1  
2  
3 381 **CONCLUSION**  
4

5  
6 382 The GAP III study aims to address the need for improvement of the methodology,  
7  
8 383 reporting and appraisal of surgical guidelines. An extension document specifically  
9  
10 384 designed for clinical practice guidelines in surgery will further improve the value, use  
11  
12  
13 385 and applicability of the AGREE II instrument in the surgical field with the ultimate  
14  
15 386 goal of enhancing patient care, experience and outcomes.  
16

17  
18 387

19  
20 388 **ACKNOWLEDGEMENTS**  
21

22  
23 389 The authors wish to thank Mrs. Meropi Gioumidou for the tireless contribution and  
24  
25 390 the excellent administrative support to the project.  
26

27  
28 391

29  
30 392

31  
32 393

33  
34 394

35  
36 395

37  
38 396

39  
40 397

41  
42 398

43  
44 399

45  
46 400

47  
48 401

49  
50 402

51  
52 403

53  
54 404  
55  
56  
57  
58  
59  
60

405 **REFERENCES**

- 406 1. Djulbegovic B, Guyatt GH. Progress in evidence-based medicine: a quarter  
407 century on. *Lancet*. 2017. doi:10.1016/S0140-6736(16)31592-6
- 408 2. PubMed.
- 409 3. Graham R, Mancher M, Wolman DM, Greenfield S, Steinberg E. *Clinical  
410 Practice Guidelines We Can Trust.*; 2011. doi:10.17226/13058
- 411 4. Altman DG, Simera I, Hoey J, Moher D, Schulz K. EQUATOR: reporting  
412 guidelines for health research. *Lancet*. 2008;371(9619):1149-1150.  
413 doi:10.1016/S0140-6736(08)60505-X
- 414 5. Equator. Equator-network.org. Equator Resource Centre.
- 415 6. Brouwers MC, Kho ME, Browman GP, et al. AGREE II: Advancing guideline  
416 development, reporting and evaluation in health care. *J Clin Epidemiol*.  
417 2010;63(12):1308-1311. doi:10.1016/j.jclinepi.2010.07.001
- 418 7. World Health Organization. WHO Handbook for Guideline Development.  
419 [http://apps.who.int/iris/bitstream/10665/75146/1/9789241548441\\_eng.pdf](http://apps.who.int/iris/bitstream/10665/75146/1/9789241548441_eng.pdf).  
420 Published 2012. Accessed October 2, 2017.
- 421 8. The guidelines manual | Guidance and guidelines | NICE.  
422 <https://www.nice.org.uk/process/pmg6/chapter/reviewing-the-evidence>.  
423 Accessed October 2, 2017.
- 424 9. Antoniou SA, Agresta F, Garcia Alamino JM, et al. European Hernia Society  
425 guidelines on prevention and treatment of parastomal hernias. *Hernia*. 2017.  
426 doi:10.1007/s10029-017-1697-5
- 427 10. Muysoms FE, Antoniou SA, Bury K, et al. European Hernia Society guidelines  
428 on the closure of abdominal wall incisions. *Hernia*. 2015;19(1).

- 1  
2  
3 429 doi:10.1007/s10029-014-1342-5  
4  
5  
6 430 11. Gorter RR, Eker HH, Gorter-Stam MAW, et al. Diagnosis and management of  
7  
8 431 acute appendicitis. EAES consensus development conference 2015. *Surg*  
9  
10 432 *Endosc.* 2016;30(11):4668-4690. doi:10.1007/s00464-016-5245-7  
11  
12  
13 433 12. López-Cano M, García-Alamino JM, Antoniou SA, et al. EHS clinical guidelines  
14  
15 434 on the management of the abdominal wall in the context of the open or burst  
16  
17 435 abdomen. *Hernia.* 2018;22(6):921-939. doi:10.1007/s10029-018-1818-9  
18  
19  
20 436 13. Morales-Conde S, Peeters A, Meyer YM, et al. European association for  
21  
22 437 endoscopic surgery (EAES) consensus statement on single-incision endoscopic  
23  
24 438 surgery. *Surg Endosc.* 2019;33(4):996-1019. doi:10.1007/s00464-019-06693-2  
25  
26  
27 439 14. Francis NK, Sylla P, Abou-Khalil M, et al. EAES and SAGES 2018 consensus  
28  
29 440 conference on acute diverticulitis management: evidence-based  
30  
31 441 recommendations for clinical practice. In: *Surgical Endoscopy.* ; 2019.  
32  
33 442 doi:10.1007/s00464-019-06882-z  
34  
35  
36  
37 443 15. Schünemann H, Brożek J, Guyatt G, Oxman A. GRADE handbook for grading  
38  
39 444 quality of evidence and strength of recommendations. The GRADE Working  
40  
41 445 Group.  
42  
43  
44 446 16. AGREE Next Steps Consortium (2009). The AGREE II Instrument [Electronic  
45  
46 447 version].  
47  
48  
49 448 17. Prinja S, Nandi A, Horton S, Levin C, Laxminarayan R. Costs, Effectiveness, and  
50  
51 449 Cost-Effectiveness of Selected Surgical Procedures and Platforms. In: *Disease*  
52  
53 450 *Control Priorities, Third Edition (Volume 1): Essential Surgery.* ; 2015.  
54  
55 451 doi:10.1596/978-1-4648-0346-8\_ch18  
56  
57  
58  
59 452 18. Jünger S, Payne SA, Brine J, Radbruch L, Brearley SG. Guidance on Conducting  
60

- 1  
2  
3 453 and REporting DElphi Studies (CREDES) in palliative care: Recommendations  
4  
5 based on a methodological systematic review. *Palliat Med.* 2017.  
6 454  
7  
8 455 doi:10.1177/0269216317690685  
9  
10 456 19. Choi J, Choi TY, Jun JH, Lee JA, Lee MS. Preferred Reporting Items for the  
11  
12 Development of Evidence-based Clinical Practice Guidelines in Traditional  
13 457  
14 Medicine (PRIDE-CPG-TM): Explanation and elaboration. *Eur J Integr Med.*  
15 458  
16 2016. doi:10.1016/j.eujim.2016.07.027  
17 459  
18  
19 460 20. Norris SL, Meerpohl JJ, Akl EA, Schünemann HJ, Chen Y, Whittington C. The  
20  
21 skills and experience of GRADE methodologists can be assessed with a simple  
22 461  
23 tool. *J Clin Epidemiol.* 2016. doi:10.1016/j.jclinepi.2016.07.001  
24 462  
25  
26 463 21. Moher D, Schulz KF, Simera I, Altman DG. Guidance for developers of health  
27  
28 research reporting guidelines. *PLoS Med.* 2010.  
29 464  
30  
31 doi:10.1371/journal.pmed.1000217  
32 465  
33  
34 466 22. Antoniou SA, Tsokani S, Mavridis D, et al. Guideline Assessment Project: Filling  
35  
36 the GAP in Surgical Guidelines. *Ann Surg.* 2019;269(4):642-651.  
37 467  
38  
39 doi:10.1097/SLA.0000000000003036  
40 468  
41  
42 469 23. Brouwers MC, Kerkvliet K, Spithof K. The AGREE reporting checklist: A tool to  
43  
44 improve reporting of clinical practice guidelines. *BMJ.* 2016.  
45 470  
46  
47 doi:10.1136/bmj.i1152  
48 471  
49  
50 472 24. Chen Z, Hong Y, Liu N, Zhang Z. Quality of critical care clinical practice  
51  
52 guidelines: Assessment with AGREE II instrument. *J Clin Anesth.* 2018;51:40-  
53 473  
54 47. doi:10.1016/j.jclinane.2018.08.011  
55 474  
56  
57 475 25. Bazzano AN, Green E, Madison A, Barton A, Gillispie V, Bazzano LAL.  
58  
59 Assessment of the quality and content of national and international guidelines  
60 476

- 1  
2  
3 477 on hypertensive disorders of pregnancy using the AGREE II instrument. *BMJ*  
4  
5  
6 478 *Open*. 2016. doi:10.1136/bmjopen-2015-009189  
7  
8 479 26. Armstrong JJ, Rodrigues IB, Wasiuta T, MacDermid JC. Quality assessment of  
9  
10 480 osteoporosis clinical practice guidelines for physical activity and safe  
11  
12 481 movement: an AGREE II appraisal. *Arch Osteoporos*. 2016.  
13  
14 482 doi:10.1007/s11657-016-0260-9  
15  
16  
17 483 27. Sabharwal S, Patel NK, Gauher S, Holloway I, Athansiou T. High methodologic  
18  
19 484 quality but poor applicability: Assessment of the AAOS guidelines using the  
20  
21 485 AGREE II instrument. *Clin Orthop Relat Res*. 2014. doi:10.1007/s11999-014-  
22  
23 486 3530-0  
24  
25  
26 487 28. Huang TW, Lai JH, Wu MY, Chen SL, Wu CH, Tam KW. Systematic review of  
27  
28 488 clinical practice guidelines in the diagnosis and management of thyroid  
29  
30 489 nodules and cancer. *BMC Med*. 2013. doi:10.1186/1741-7015-11-191  
31  
32  
33 490 29. Wong JJ, Côté P, Sutton DA, et al. Clinical practice guidelines for the  
34  
35 491 noninvasive management of low back pain: A systematic review by the  
36  
37 492 Ontario Protocol for Traffic Injury Management (OPTIMa) Collaboration. *Eur J*  
38  
39 493 *Pain (United Kingdom)*. 2017. doi:10.1002/ejp.931  
40  
41  
42 494 30. Acuna SA, Huang JW, Scott AL, et al. Cancer Screening Recommendations for  
43  
44 495 Solid Organ Transplant Recipients: A Systematic Review of Clinical Practice  
45  
46 496 Guidelines. *Am J Transplant*. 2017. doi:10.1111/ajt.13978  
47  
48  
49 497 31. van Dijk AH, de Reuver PR, Besselink MG, et al. Assessment of available  
50  
51 498 evidence in the management of gallbladder and bile duct stones: a systematic  
52  
53 499 review of international guidelines. *HPB*. 2017. doi:10.1016/j.hpb.2016.12.011  
54  
55  
56 500 32. Zeng M, Yi Q, Zeng L, et al. Quality of therapeutic drug monitoring (TDM)



- 1  
2  
3 501 guidelines is suboptimal: an evaluation using the AGREE II instrument. *J Clin*  
4  
5 502 *Epidemiol.* October 2019. doi:10.1016/j.jclinepi.2019.10.007  
6  
7  
8 503 33. Chen Y, Yang K, Marušić A, et al. A reporting tool for practice guidelines in  
9  
10 504 health care: The RIGHT statement. *Ann Intern Med.* 2017;166(2):128-132.  
11  
12 505 doi:10.7326/M16-1565  
13  
14  
15 506 34. Wang X, Zhou Q, Chen Y, et al. Protocol of reporting items for public versions  
16  
17 507 of guidelines: The Reporting Tool for Practice Guidelines in Health Care-public  
18  
19 508 versions of guidelines. *BMJ Open.* 2019. doi:10.1136/bmjopen-2018-023147  
20  
21  
22 509 35. Song Y, Darzi A, Ballesteros M, et al. Extending the RIGHT statement for  
23  
24 510 reporting adapted practice guidelines in healthcare: the RIGHT-Ad@pt  
25  
26 511 Checklist protocol. *BMJ Open.* 2019. doi:10.1136/bmjopen-2019-031767  
27  
28  
29 512  
30  
31 513  
32  
33 514  
34  
35 515  
36  
37 516  
38  
39 517  
40  
41 518  
42  
43 519  
44  
45 520  
46  
47 521  
48  
49 522  
50  
51 523  
52  
53 524  
54  
55  
56  
57  
58  
59  
60

1  
2  
3 525 **FIGURE LEGEND**  
4

5  
6 526 **Fig. 1:** Development steps of the Guideline Assessment Project with the ultimate  
7  
8 527 objective to develop an AGREE II extension document for surgical guidelines  
9

10 528

11  
12  
13 529

14  
15 530

16  
17 531

18  
19  
20 532

21  
22 533

23  
24  
25 534

26  
27 535

28  
29  
30 536

31  
32 537

33  
34  
35 538

36  
37 539

38  
39  
40 540

41  
42 541

43  
44  
45 542

46  
47 543

48  
49  
50 544

51  
52 545

53  
54  
55 546

56  
57 547

58  
59 548  
60

For peer review only

1  
2  
3 549 **Table 1.** Stakeholders to participate in a web-based Delphi process  
4  
5  
6 550  
7

| Function                                                                                                                                                                                                                                                                           |
|------------------------------------------------------------------------------------------------------------------------------------------------------------------------------------------------------------------------------------------------------------------------------------|
| General Surgeon                                                                                                                                                                                                                                                                    |
| Urologist                                                                                                                                                                                                                                                                          |
| Thoracic Surgeon                                                                                                                                                                                                                                                                   |
| Vascular Surgeon                                                                                                                                                                                                                                                                   |
| Pediatric Surgeon                                                                                                                                                                                                                                                                  |
| Journal Editor                                                                                                                                                                                                                                                                     |
| National authority representative                                                                                                                                                                                                                                                  |
| NICE representative                                                                                                                                                                                                                                                                |
| Guideline developer/Representative from Europe                                                                                                                                                                                                                                     |
| Guideline developer/Representative from North America                                                                                                                                                                                                                              |
| Guideline developer/Representative from Asia                                                                                                                                                                                                                                       |
| Guideline developer/Representative from middle-income country                                                                                                                                                                                                                      |
| Healthcare provider representative                                                                                                                                                                                                                                                 |
| Representative from GRADE                                                                                                                                                                                                                                                          |
| Guideline implementer                                                                                                                                                                                                                                                              |
| Patient representative                                                                                                                                                                                                                                                             |
| WHO representative                                                                                                                                                                                                                                                                 |
| European Commission representative                                                                                                                                                                                                                                                 |
| GIN representative                                                                                                                                                                                                                                                                 |
| EQUATOR representative                                                                                                                                                                                                                                                             |
| NICE: National Institute of Health and Care Excellence<br>GRADE: Grading of Recommendation Assessment, Development and Evaluation<br>WHO: World Health Organization<br>GIN: Guidelines International Network<br>EQUATOR: Enhancing the QUALity and Transparency Of health Research |

8  
9  
10  
11  
12  
13  
14  
15  
16  
17  
18  
19  
20  
21  
22  
23  
24  
25  
26  
27  
28  
29  
30  
31  
32  
33  
34  
35  
36  
37  
38  
39  
40  
41  
42  
43  
44  
45  
46  
47  
48  
49  
50  
51  
52 551  
53  
54  
55  
56  
57  
58  
59  
60

1  
2  
3  
4  
5  
6  
7  
8  
9  
10  
11  
12  
13  
14  
15  
16  
17  
18  
19  
20  
21  
22  
23  
24  
25  
26  
27  
28  
29  
30  
31  
32  
33  
34  
35  
36  
37  
38  
39  
40  
41  
42  
43  
44  
45  
46  
47  
48  
49  
50  
51  
52  
53  
54  
55  
56

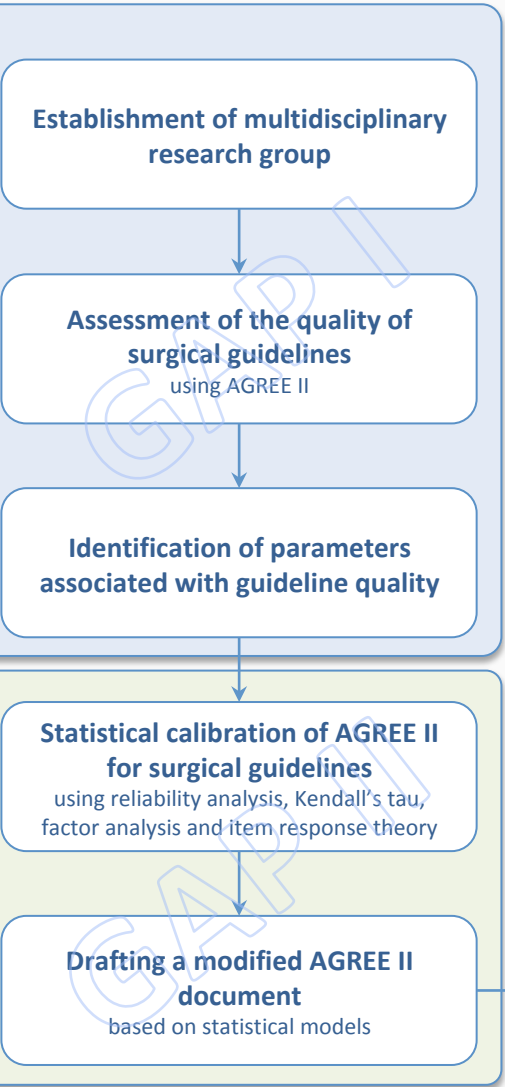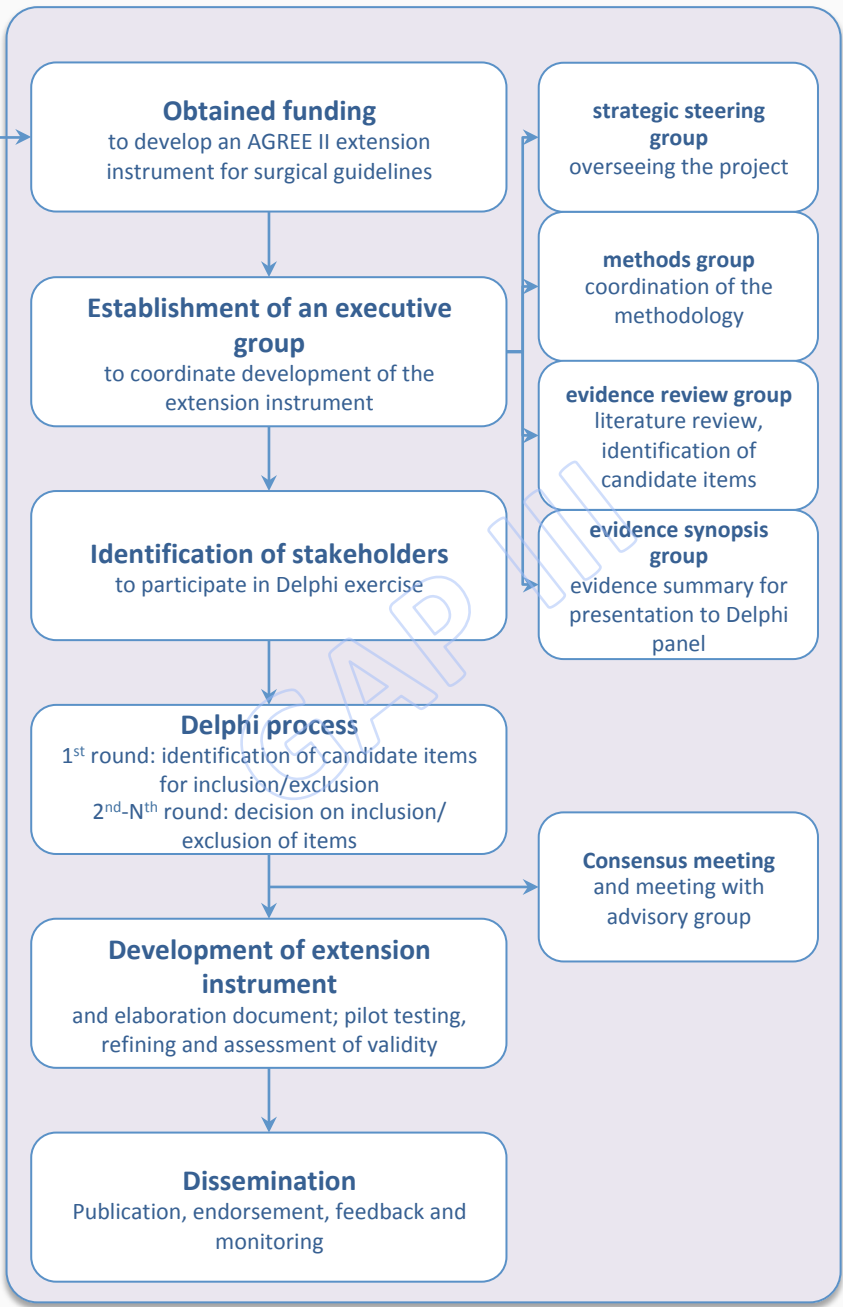

## APPENDIX

## The AGREE II instrument

Adapted from: Brouwers MC, Kerkvliet K, Spithoff K. The AGREE Reporting Checklist: a tool to improve reporting of clinical practice guidelines. *BMJ*. 2016:i1152.

| Domains                     | Items                                                                                                         | Assessment* |
|-----------------------------|---------------------------------------------------------------------------------------------------------------|-------------|
| I. Scope and purpose        | 1. The overall objective(s) of the guideline is (are) specifically described.                                 | 1 to 7      |
|                             | 2. The health question(s) covered by the guideline is (are) specifically described.                           | 1 to 7      |
|                             | 3. The population (patients, public, etc.) to whom the guideline is meant to apply is specifically described. | 1 to 7      |
| II. Stakeholder involvement | 4. The guideline development group includes individuals from all relevant professional groups.                | 1 to 7      |
|                             | 5. The views and preferences of the target population (patients, public, etc.) have been sought.              | 1 to 7      |
|                             | 6. The target users of the guideline are clearly defined.                                                     | 1 to 7      |
| III. Rigor of development   | 7. Systematic methods were used to search for evidence.                                                       | 1 to 7      |
|                             | 8. The criteria for selecting the evidence are clearly described.                                             | 1 to 7      |
|                             | 9. The strengths and limitations of the body of evidence are clearly described.                               | 1 to 7      |
|                             | 10. The methods for formulating the recommendations are clearly described.                                    | 1 to 7      |
|                             | 11. The health benefits, side effects, and risks have been considered in formulating the recommendations.     | 1 to 7      |
|                             | 12. There is an explicit link between the recommendations and the supporting evidence.                        | 1 to 7      |
|                             | 13. The guideline has been externally reviewed by experts prior to its publication.                           | 1 to 7      |
|                             | 14. A procedure for updating the guideline is provided.                                                       | 1 to 7      |

|                                                  |                                                                                                     |                                                                                                          |
|--------------------------------------------------|-----------------------------------------------------------------------------------------------------|----------------------------------------------------------------------------------------------------------|
| <b>IV. Clarity of presentation</b>               | 15. The recommendations are specific and unambiguous.                                               | 1 to 7                                                                                                   |
|                                                  | 16. The different options for management of the condition or health issue are clearly presented.    | 1 to 7                                                                                                   |
|                                                  | 17. Key recommendations are easily identifiable.                                                    | 1 to 7                                                                                                   |
| <b>V. Applicability</b>                          | 18. The guideline describes facilitators and barriers to its application.                           | 1 to 7                                                                                                   |
|                                                  | 19. The guideline provides advice and/or tools on how the recommendations can be put into practice. | 1 to 7                                                                                                   |
|                                                  | 20. The potential resource implications of applying the recommendations have been considered.       | 1 to 7                                                                                                   |
|                                                  | 21. The guideline presents monitoring and/or auditing criteria.                                     | 1 to 7                                                                                                   |
| <b>VI. Editorial independence</b>                | 22. The views of the funding body have not influenced the content of the guideline.                 | 1 to 7                                                                                                   |
|                                                  | 23. Competing interests of guideline development group members have been recorded and addressed.    | 1 to 7                                                                                                   |
| <b>Overall guideline assessment</b>              | 24. Rate the overall quality of this guideline.                                                     | 1 to 7                                                                                                   |
|                                                  | 25. I would recommend this guideline for use.                                                       | <ul style="list-style-type: none"> <li>• Yes</li> <li>• Yes, with modifications</li> <li>• No</li> </ul> |
| * 7 corresponds to the highest possible quality. |                                                                                                     |                                                                                                          |

# BMJ Open

## Protocol of an Interdisciplinary Consensus Project Aiming to Develop an AGREE II Extension for Guidelines in Surgery

|                                 |                                                                                                                                                                                                                                                                                                                                                                                                                                                                                                                                                                                                                                                                                                                                                                                                                                                                                                                                                                                                                                                                                                                                                                                                                        |
|---------------------------------|------------------------------------------------------------------------------------------------------------------------------------------------------------------------------------------------------------------------------------------------------------------------------------------------------------------------------------------------------------------------------------------------------------------------------------------------------------------------------------------------------------------------------------------------------------------------------------------------------------------------------------------------------------------------------------------------------------------------------------------------------------------------------------------------------------------------------------------------------------------------------------------------------------------------------------------------------------------------------------------------------------------------------------------------------------------------------------------------------------------------------------------------------------------------------------------------------------------------|
| Journal:                        | <i>BMJ Open</i>                                                                                                                                                                                                                                                                                                                                                                                                                                                                                                                                                                                                                                                                                                                                                                                                                                                                                                                                                                                                                                                                                                                                                                                                        |
| Manuscript ID                   | bmjopen-2020-037107.R1                                                                                                                                                                                                                                                                                                                                                                                                                                                                                                                                                                                                                                                                                                                                                                                                                                                                                                                                                                                                                                                                                                                                                                                                 |
| Article Type:                   | Protocol                                                                                                                                                                                                                                                                                                                                                                                                                                                                                                                                                                                                                                                                                                                                                                                                                                                                                                                                                                                                                                                                                                                                                                                                               |
| Date Submitted by the Author:   | 26-May-2020                                                                                                                                                                                                                                                                                                                                                                                                                                                                                                                                                                                                                                                                                                                                                                                                                                                                                                                                                                                                                                                                                                                                                                                                            |
| Complete List of Authors:       | <p>Antoniou, George A.; Royal Oldham Hospital, Department of Vascular &amp; Endovascular Surgery; The University of Manchester</p> <p>Mavridis, Dimitris ; University of Ioannina, Department of Primary Education, School of Education; Université Paris Descartes Faculté de Médecine</p> <p>Tsokani, Sofia; University of Ioannina, Department of Primary Education</p> <p>Lopez-Cano, Manuel; Universitat Autònoma de Barcelona, Abdominal Wall Surgery Unit, Department of General Surgery, Hospital Universitari Vall d'Hebron</p> <p>Florez, Ivan; McMaster University, Department of Health Research Methods Evidence and Impact; Universidad de Antioquia, Department of Pediatrics</p> <p>Brouwers, Melissa; McMaster University, Department of Health Research Methods Evidence and Impact</p> <p>Markar, Sheraz R.; Imperial College London, Department of Surgery and Cancer</p> <p>Silecchia , Gianfranco ; University of Rome La Sapienza, Department of Surgery</p> <p>Francis, Nader; Yeovil District Hospital NHS Foundation Trust, Department of General Surgery</p> <p>Antoniou, Stavros; European University Cyprus School of Medicine; Mediterranean Hospital of Cyprus, Surgical Department</p> |
| <b>Primary Subject Heading</b>: | Surgery                                                                                                                                                                                                                                                                                                                                                                                                                                                                                                                                                                                                                                                                                                                                                                                                                                                                                                                                                                                                                                                                                                                                                                                                                |
| Secondary Subject Heading:      | Evidence based practice, Health policy                                                                                                                                                                                                                                                                                                                                                                                                                                                                                                                                                                                                                                                                                                                                                                                                                                                                                                                                                                                                                                                                                                                                                                                 |
| Keywords:                       | SURGERY, Protocols & guidelines < HEALTH SERVICES ADMINISTRATION & MANAGEMENT, Quality in health care < HEALTH SERVICES ADMINISTRATION & MANAGEMENT, Health policy < HEALTH SERVICES ADMINISTRATION & MANAGEMENT                                                                                                                                                                                                                                                                                                                                                                                                                                                                                                                                                                                                                                                                                                                                                                                                                                                                                                                                                                                                       |
|                                 |                                                                                                                                                                                                                                                                                                                                                                                                                                                                                                                                                                                                                                                                                                                                                                                                                                                                                                                                                                                                                                                                                                                                                                                                                        |

SCHOLARONE™  
Manuscripts



I, the Submitting Author has the right to grant and does grant on behalf of all authors of the Work (as defined in the below author licence), an exclusive licence and/or a non-exclusive licence for contributions from authors who are: i) UK Crown employees; ii) where BMJ has agreed a CC-BY licence shall apply, and/or iii) in accordance with the terms applicable for US Federal Government officers or employees acting as part of their official duties; on a worldwide, perpetual, irrevocable, royalty-free basis to BMJ Publishing Group Ltd ("BMJ") its licensees and where the relevant Journal is co-owned by BMJ to the co-owners of the Journal, to publish the Work in this journal and any other BMJ products and to exploit all rights, as set out in our [licence](#).

The Submitting Author accepts and understands that any supply made under these terms is made by BMJ to the Submitting Author unless you are acting as an employee on behalf of your employer or a postgraduate student of an affiliated institution which is paying any applicable article publishing charge ("APC") for Open Access articles. Where the Submitting Author wishes to make the Work available on an Open Access basis (and intends to pay the relevant APC), the terms of reuse of such Open Access shall be governed by a Creative Commons licence – details of these licences and which [Creative Commons](#) licence will apply to this Work are set out in our licence referred to above.

Other than as permitted in any relevant BMJ Author's Self Archiving Policies, I confirm this Work has not been accepted for publication elsewhere, is not being considered for publication elsewhere and does not duplicate material already published. I confirm all authors consent to publication of this Work and authorise the granting of this licence.



1  
2  
3 **1** Study protocol  
4  
5  
6

7 **2**

8 **3** **Protocol of an Interdisciplinary Consensus Project Aiming to Develop an AGREE II**  
9

10 **4** **Extension for Guidelines in Surgery**  
11  
12

13 **5**

14  
15 **6** **Authors**  
16

17  
18 **7** George A Antoniou MD PhD MSc FEBVS,<sup>1,2</sup> Dimitris Mavridis BSc PhD,<sup>3,4</sup> Sofia Tsokani

19  
20 **8** BSc MSc,<sup>3</sup> Manuel López-Cano MD PhD,<sup>5</sup> Iván Flórez MD MSc,<sup>6,7</sup> Melissa Brouwers

21  
22 **9** PhD,<sup>6</sup> Sheraz Markar MD PhD,<sup>8</sup> Gianfranco Silecchia MD PhD,<sup>9</sup> Nader K Francis

23  
24  
25 **10** MBChB FRCS PhD,<sup>10</sup> Stavros A Antoniou MD PhD MPH FEBS<sup>11,12</sup>  
26  
27

28 **11**

29  
30 **12** **Affiliations**  
31

32 **13** 1. Department of Vascular and Endovascular Surgery, The Royal Oldham Hospital,  
33  
34 Pennine Acute Hospitals NHS Trust, Manchester, United Kingdom  
35

36  
37 **15** 2. Division of Cardiovascular Sciences, School of Medical Sciences, The University of  
38  
39 Manchester, Manchester, United Kingdom  
40

41  
42 **17** 3. Department of Primary Education, School of Education, University of Ioannina,  
43  
44 Ioannina, Greece  
45

46  
47 **19** 4. Faculté de Médecine, Université Paris Descartes, Paris, France  
48

49  
50 **20** 5. Abdominal Wall Surgery Unit, Department of General Surgery, Hospital  
51  
52 Universitari Vall d'Hebron, Universitat Autònoma de Barcelona, Barcelona, Spain  
53

54  
55 **22** 6. Department of Health Research Methods Evidence and Impact, McMaster  
56  
57 University, Hamilton, Ontario, Canada  
58

59  
60 **24** 7. Department of Pediatrics, Universidad de Antioquia, Medellin, Colombia

1  
2  
3 25 8. Department of Surgery and Cancer, Imperial College, London, United Kingdom  
4

5  
6 26 9. Department of Surgery, University Hospital "La Sapienza", Rome, Italy  
7

8 27 10. Department of General Surgery, Yeovil District Hospital NHS Foundation Trust,  
9

10  
11 28 Higher Kingston, Yeovil, United Kingdom  
12

13 29 11. Medical School, European University of Cyprus, Nicosia, Cyprus  
14

15 30 12. Surgical Department, Mediterranean Hospital of Cyprus, Limassol, Cyprus  
16  
17

18 31

19  
20 32 **Corresponding author**  
21

22  
23 33 Mr. George A Antoniou MD PhD MSc FEBVS  
24

25 34 **Address:** Surgical Offices, Phase 1, The Royal Oldham Hospital, Rochdale Road,  
26

27  
28 35 Oldham OL1 2JH, United Kingdom  
29

30 36 **E-mail:** antoniou.ga@hotmail.com, Georgios.Antoniou@pat.nhs.uk  
31

32 37  
33

34  
35 38 **Disclosures**  
36

37 39 The authors disclose no conflicts of interest.  
38  
39

40 40

41 41 **Funding**  
42

43 42 This project received funding from the United European Gastroenterology and the  
44

45 43 European Association for Endoscopic Surgery. The funding bodies had no influence  
46

47 44 on the development of this protocol.  
48  
49

50  
51 45  
52

53 46  
54

55 47  
56

57 48  
58  
59  
60

1  
2  
3 49 **ABSTRACT**  
4  
5

6 50 **Introduction** AGREE II is an instrument that informs development, reporting and  
7  
8 51 assessment of clinical practice guidelines. Previous research has demonstrated the  
9  
10 52 need for improvement in methodological and reporting quality of clinical practice  
11  
12 53 guidelines specifically in surgery. We aim to develop an AGREE II extension  
13  
14 54 document for application in surgical guidelines.  
15  
16

17 55 **Methods and analysis** We have performed a structured literature review and  
18  
19 56 assessment of guidelines in surgery using the AGREE II instrument. In exploratory  
20  
21 57 analyses, we have identified factors associated with guideline quality. We have  
22  
23 58 performed reliability and factor analyses to inform the development of an extension  
24  
25 59 document. We will summarize this information and present it to a Delphi panel of  
26  
27 60 stakeholders. We will perform iterative Delphi rounds and we will summarize the  
28  
29 61 final results to develop the extension instrument in a dedicated consensus  
30  
31 62 conference.  
32  
33  
34  
35  
36

37 63 **Ethics and dissemination** Funding bodies will not be involved in the development of  
38  
39 64 the instrument. Research Ethics Committee and Health Research Authority approval  
40  
41 65 was waived, since this is a professional staff study only and no duty of care lies with  
42  
43 66 the NHS (National Health Service) to any of the participants. Conflicts of interest, if  
44  
45 67 any, will be addressed by re-assigning functions or replacing participants with  
46  
47 68 relevant conflicts. The results will be disseminated through publication in peer  
48  
49 69 reviewed journals, the funders' websites, social media, and direct contact with  
50  
51 70 guideline development organizations and peer-reviewed journals that publish  
52  
53 71 guidelines.  
54  
55  
56  
57  
58  
59  
60

72

1  
2  
3 734  
5 746  
7  
8 75 **KEYWORDS**9  
10 76 AGREE II; clinical practice guideline; reporting quality; development; methodology;11  
12  
13 77 EQUATOR Network14  
15 7816  
17 7918  
19  
20 80 **STRENGTHS AND LIMITATIONS**21  
22  
23 81 • This is the first project to address guideline development and reporting in surgery.24  
25 82 • It will combine statistical considerations, conceptual parameters to be derived  
26  
27 83 from qualitative synthesis and a formal Delphi process.28  
29  
30 84 • It will involve a panel of stakeholders from a variety of scientific, cultural and  
31  
32 85 geographical backgrounds.33  
34  
35 86 • The project will not address specific disciplines of surgery.36  
37 8738  
39 8840  
41 8942  
43 9044  
45 9146  
47 9248  
49 9350  
51 9452  
53 9554  
55 9656  
57  
58  
59  
60

1  
2  
3 97  
4  
56 98  
78 99 **INTRODUCTION**  
9

10 100 Research evidence is the primary source to inform medical practice forming the  
11  
12  
13 101 cornerstone of evidence-based medicine.<sup>1</sup> An average of 5,639 new articles were  
14  
15 102 indexed per month under the subject heading 'Surgery' in the National Library of  
16  
17 103 Medicine over the past decade.<sup>2</sup> Given this fact, keeping abreast of the latest  
18  
19 104 evidence is a strenuous task for healthcare practitioners. Clinical practice guidelines  
20  
21 105 evaluate, summarize and contextualize research evidence into actionable  
22  
23 106 recommendations.<sup>3</sup> As such, guidelines have a direct impact on delivery of  
24  
25 107 healthcare and surgical services. It is therefore of paramount importance to ensure  
26  
27 108 the highest quality standards in developing and reporting guidelines.  
28  
29  
30  
31

32 109 A great amount of scientific endeavor in the past few years has focused on  
33  
34 110 the quality of scholarly work, including clinical practice guidelines.<sup>4</sup> Reporting  
35  
36 111 standards have been developed for virtually all study designs and have been  
37  
38 112 summarized by the EQUATOR (Enhancing the QUALity and Transparency Of health  
39  
40 113 Research) Network.<sup>5</sup> AGREE II (Appraisal of Guidelines for Research and Evaluation)  
41  
42 114 constitutes a framework for developing, appraising and reporting clinical practice  
43  
44 115 guidelines.<sup>6</sup> It is endorsed by major international and national agencies, including the  
45  
46 116 World Health Organization and the National Institute for Health and Care Excellence  
47  
48 117 (NICE) in the United Kingdom.<sup>7,8</sup> AGREE II is a generic tool that applies to all  
49  
50 118 disciplines of medicine and no modification or extension of the framework has been  
51  
52 119 proposed, described or developed for specific clinical branches such as surgery.  
53  
54  
55  
56  
57  
58  
59  
60

1  
2  
3 120 The tool is comprized of 23 items organized in 7 thematic domains: Scope  
4  
5 121 and purpose, Stakeholder involvement, Rigor of development, Clarity of  
6  
7 122 presentation, Applicability, and Editorial independence. It concludes with an overall  
8  
9 123 assessment and a statement of whether the guideline is considered of sufficient  
10  
11 124 quality to be used or recommended in clinical practice (**Appendix**).  
12  
13  
14

15 125

16  
17  
18 126 *The need for an AGREE II extension*

19  
20 127 Our research group has acted as methodological and content coordinators of  
21  
22 128 landmark surgical guidelines and have served as members of surgical guideline  
23  
24 129 development groups.<sup>9,10,11,12,13,14</sup> Even though members of our group, in their role as  
25  
26 130 guideline developers, have made every effort to comply with the highest  
27  
28 131 methodological standards, as indicated by adherence to GRADE (Grading of  
29  
30 132 Recommendations Assessment, Development and Evaluation) and AGREE II  
31  
32 133 methodologies,<sup>15,16</sup> we noticed that compliance with all aspects of several  
33  
34 134 parameters of the AGREE II instrument was not possible.  
35  
36  
37  
38  
39

40 135 For example, the item “The potential resource implications of applying the  
41  
42 136 recommendations have been considered” may be difficult to be universally  
43  
44 137 addressed. Cost-effectiveness studies are scarce in the surgical literature and  
45  
46 138 relevant evidence typically varies in different settings.<sup>17</sup> Since surgical expertise  
47  
48 139 varies across countries and institutions, there is a need for the instrument to  
49  
50 140 consistently apply to different healthcare settings. Surgical interventions are  
51  
52 141 complex and details on the interventions/comparators are imperative for the target  
53  
54 142 users to be able to assess the external validity of the guidelines. Specialists from  
55  
56 143 different specialties and allied health professionals with a wide range of expertise  
57  
58  
59  
60

1  
2  
3 144 are involved in the treatment of surgical patients, which makes their involvement in  
4  
5 145 guideline development paramount. We have hypothesized that the original AGREE II  
6  
7  
8 146 document may not be applicable to clinical practice guidelines in surgery, which  
9  
10 147 offer represent complex and multifaceted interventions.  
11  
12

13 148

15 149 *Objective*

17  
18 150 There are a few guideline reporting documents in other fields of medicine,<sup>18,19</sup>  
19  
20 151 however a scoping literature review by our group has not identified any document to  
21  
22 152 inform guideline development and reporting in the field of surgery. Our aim is to  
23  
24 153 develop an extension of the AGREE II instrument that is specific for surgery through  
25  
26 154 an evidence-informed and consensus-based approach.  
27  
28  
29

30 155

32 156 **METHODS AND ANALYSIS**

34  
35 157 We have formed an international multi- and inter-disciplinary collaborative  
36  
37 158 research working group, that consists of surgeons, guideline developers, evidence  
38  
39 159 synthesis experts, GRADE methodologists,<sup>20</sup> biostatisticians and a lead member of  
40  
41 160 the AGREE collaboration. This is a tripartite project named *Guideline Assessment*  
42  
43 161 *Project: Filling the GAP in Surgical Guidelines*. A summary of the project is outlined in  
44  
45  
46  
47 162 **Fig. 1.** The project is a result of a partnership between an international team of  
48  
49 163 surgical research experts and two of the AGREE research team leads (IF and MB). The  
50  
51 164 AGREE research team is currently under a membership renovation process, and,  
52  
53 165 therefore, neither of the authors can speak on behalf of the entire AGREE group.  
54  
55  
56  
57 166 However, both AGREE research team leads state that AGREE has supported the  
58  
59 167 project from its inception. Furthermore, they have agreed to support dissemination  
60

1  
2  
3 168 activities by making this new tool available in the AGREE website  
4  
5  
6 169 (<https://agreetrust.org>).

7  
8 170

9  
10  
11 171 This protocol complies with the Guidance for Developers of Health Research  
12  
13 172 Reporting Guidelines.<sup>21</sup>

14  
15  
16 173

17  
18 174 • *Patient and public involvement*

19  
20  
21 175 No patients were involved in the development of this protocol.

22  
23 176

24  
25 177 • *GAP I Project: Literature review and exploratory analyses*

26  
27  
28 178 We have previously performed a structured review to identify clinical practice  
29  
30 179 guidelines in the field of surgery published over a 10-year period.<sup>22</sup> We have  
31  
32  
33 180 assessed the methodological and reporting quality of the selected guidelines using  
34  
35 181 the original AGREE II criteria. Domain scores (calculated by summing up all the scores  
36  
37 182 of the individual items in a domain and by scaling the total as a percentage of the  
38  
39 183 maximum possible score for that domain)<sup>16</sup> ranged between 0-56%, suggesting  
40  
41 184 generally inadequate and highly variable guideline quality. The median overall score  
42  
43 185 was 4 out of a maximum of 7, and 40% of guidelines were not considered suitable  
44  
45 186 for use based on their quality as assessed using the AGREE II instrument.

46  
47  
48 187 In exploratory analyses, we have found guidelines produced by surgical  
49  
50 188 organizations with a high ( $\geq 1$  guideline per year) output (odds ratio 3.79, 95%  
51  
52 189 confidence interval, 1.01–12.66) and those produced by surgical organizations with a  
53  
54 190 guideline committee (odds ratio 4.15, 95% confidence interval, 1.47–11.77) have  
55  
56 191 higher odds of reaching sufficient quality and being recommended for use.<sup>22</sup>



1  
2  
3 192  
4  
5

6 193 • *GAP II: Statistically calibrating the AGREE II instrument*  
7

8 194 The second part of this project was focused on statistical calibration of the AGREE II  
9  
10 195 instrument. We have used quality appraisal data from GAP I and employed a series  
11  
12 196 of statistical methods to explore reliability, internal consistency and  
13  
14 197 unidimensionality of the AGREE II instrument when it is applied in surgical  
15  
16 198 guidelines. We investigated the internal consistency that refers to the extent to  
17  
18 199 which all items of the instrument measure the same hypothetical construct. We  
19  
20 200 explored if and how test items are intercorrelated. Large intercorrelations among  
21  
22 201 test items are indicative of the items measuring the same construct. Using reliability  
23  
24 202 analysis, Kendall's tau statistics, factor analysis and the item response theory, we  
25  
26 203 explored whether items of each AGREE II domain are intercorrelated and are,  
27  
28 204 therefore, indicators of the same construct. Statistical modeling showed that  
29  
30 205 excluding 5 items from the original tool (items 1, 2, 5, 7 and 8) and re-arranging the  
31  
32 206 remaining items into 4 domains instead of 6 would enhance the instrument.. We  
33  
34 207 have finally drafted a modified AGREE II document for guidelines in surgery, on the  
35  
36 208 basis of the outcomes of statistical models.  
37  
38  
39  
40  
41  
42  
43  
44

45 209

46  
47 210 • *GAP III: AGREE II Extension for Surgical Guidelines*  
48

49 211 The third part of the project aims to use the information from the previous GAP  
50  
51 212 projects and other published information on the topic to develop the extension  
52  
53 213 document using a structured Delphi process involving relevant stakeholders.  
54  
55

56  
57 214 The multidisciplinary Delphi panel will include surgical specialists, journal  
58  
59 215 editors, guideline development bodies, GRADE representatives, and patient  
60

1  
2  
3 216 representatives. Under consideration of the evidence, stakeholders will be asked to  
4  
5 217 provide their input through a Delphi process, which will inform the preparation of an  
6  
7  
8 218 AGREE II extension for surgical guidelines.  
9

10  
11 219

12  
13 220 *Funding*

14  
15 221 This third part of the project is funded by United European Gastroenterology and the  
16  
17 222 European Association for Endoscopic Surgery. The funding bodies did not have any  
18  
19 223 influence on the previous work and will not have influence on the upcoming process.  
20  
21  
22

23 224

24  
25 225 *Participants*

26  
27 226 The executive group consists of surgeons (MLC, SRM, GS, GAA, NKF, SAA), members  
28  
29 227 of surgical quality and research boards (MLC, NKF, SAA), guideline developers (MLC,  
30  
31 228 IF, MB, GS, NKF, SAA), evidence synthesis experts (IF, GAA, DM, SAA), GRADE  
32  
33 229 methodologists (MLC, SAA),<sup>20</sup> biostatisticians (DM, ST), and 2 leads of the AGREE  
34  
35 230 Group (IF, MB). It is further divided into 4 working groups with distinct functions and  
36  
37 231 responsibilities:  
38  
39

- 40  
41  
42 232 • The strategic steering group is responsible for overseeing the project.  
43  
44 233 • The methods group coordinates the methodology of the project.  
45  
46  
47 234 • The evidence review group will review the literature for evidence on candidate  
48  
49 235 new items to be included in the extension document.  
50  
51  
52 236 • The evidence synopsis group will summarize evidence for presentation to Delphi  
53  
54 237 participants.  
55  
56  
57  
58  
59  
60

1  
2  
3 238 The group attended a one-day meeting to discuss the findings of previous  
4  
5 239 work, define the methodology and study design, and identify potential stakeholder  
6  
7  
8 240 groups to comprise the Delphi panel.  
9

10 241

11  
12  
13 242 *Delphi process*

14  
15 243 The Delphi panel will consist of key stakeholders, including; representatives from  
16  
17 244 different surgical disciplines (general surgery, urology, thoracic surgery, vascular  
18  
19 245 surgery, pediatric surgery), guideline developers from different continents and  
20  
21 246 representatives of guideline development organizations. The public will be involved  
22  
23 247 by participation of patient representatives from the European Patients Forum (**Table**  
24  
25 248 **1**). We will develop a web-based survey tool to facilitate Delphi exercises. Findings of  
26  
27 249 previous work (GAP I and GAP II) and further evidence that will be identified through  
28  
29 250 a scoping literature review will be summarized and presented to Delphi participants.  
30  
31 251 Summary information will also be available on the project website at [https://gap-  
34  
35 253 project.org](https://gap-<br/>32<br/>33 252 project.org). Online links to full documents for detailed review of the evidence will be  
36  
37  
38  
39  
40  
41 provided.

42 254 The first round will include open-ended questions to identify candidate items  
43  
44 255 for inclusion in the extension document. Responses will be grouped and summarized  
45  
46 256 by the methods group before the second round is commenced.

47  
48 257 The second round will include closed-ended questions in a 5-point Likert  
49  
50 258 scale to assess participants' opinions and level of agreement on including candidate  
51  
52 259 items or excluding existing items from the extension document. As per protocol, 1/2  
53  
54 260 indicates strong/moderate disagreement, 3 indicates no opinion, and 4/5 indicates  
55  
56 261 moderate/strong agreement. Candidate items will have been identified through GAP  
57  
58  
59  
60

1  
2  
3 262 I and GAP II, and the scoping literature review. We will discard low-scoring items (i.e.  
4  
5 263 those with a median score of 1/2 on the Likert scale) and use the shortlisted items in  
6  
7  
8 264 a third Delphi round. We will repeat the process until an agreement of 80% (4/5 on  
9  
10 265 the Likert scale) is reached among Delphi participants.

11  
12  
13 266 The Delphi panel's contribution will be acknowledged by group authorship in  
14  
15 267 subsequent publications of the extension document, the elaboration document and  
16  
17 268 supporting tools.

18  
19  
20 269

21  
22  
23 270 *Qualitative research synthesis*

24  
25 271 We will perform qualitative evidence synthesis to identify factors of conceptual  
26  
27 272 importance to the quality of evidence in surgery. The overarching question will be:

28  
29 273 How do clinical practice guidelines in surgery differ from non-surgical guidelines?

30  
31 274 Specific thematic questions will be addressed:

32  
33  
34  
35 275 1. Which are the concepts that make surgical guidelines different from guidelines  
36  
37 276 or summary evidence in other medical fields?

38  
39  
40 277 2. Which are potential items that may be of sufficient importance to be included in  
41  
42 278 an AGREE II Extension for surgical guidelines?

43  
44 279 3. Which are the items of the original AGREE II that might not be relevant to  
45  
46 280 surgical guidelines?

47  
48 281 4. How should items of the original AGREE II instrument be modified to be more  
49  
50 282 relevant to an AGREE II Extension for surgical guidelines?

51  
52  
53 283 We will conduct a scoping search of PubMed, Embase and Google Scholar. In  
54  
55 284 keeping with realist review guidelines,<sup>23</sup> there will be no restrictions on the types of  
56  
57 285 study design eligible for inclusion. We will consider editorials, letters to the editor,  
58  
59  
60

1  
2  
3 286 commentaries, opinions and any type of publication that captures the breadth  
4  
5 287 discussions about development of surgical guidelines. Information will be used to  
6  
7  
8 288 identify characteristics that specifically apply to surgical guidelines.  
9

10 289 The realist review will aim to develop an explanatory understanding of  
11  
12 290 development and reporting of surgical guidelines, how surgical guidelines differ from  
13  
14 291 non-surgical ones, and how AGREE II can be modified to reflect the specific aspects  
15  
16 292 of surgical guidelines. According to the realist synthesis methodology, studies will be  
17  
18 293 assessed based on criteria of relevance (whether they contribute to the development or  
19  
20 294 testing of the initial theories)<sup>24</sup> and appropriateness for addressing the research  
21  
22 295 questions.<sup>25,26</sup>  
23  
24  
25  
26

27 296 Studies will be entered into ATLAS.ti and coded to identify the specific  
28  
29 297 features relevant to development and reporting of surgical guidelines. Themes will  
30  
31 298 be discussed by the research team using an iterative and speculative process (Wong,  
32  
33 299 Greenhalgh et al. 2010). Adjudication and triangulation will be applied to refine  
34  
35 300 theories which can be used across the studies to understand findings.  
36  
37  
38

39 301 Furthermore, we will invite users of social media through the project account  
40  
41 302 on Twitter (@GAPProject2) and through communication streams of the sponsoring  
42  
43 303 bodies (Facebook, Twitter and email newsletters) to nominate parameters of  
44  
45 304 importance in the development and reporting of guidelines in surgery, and will  
46  
47 305 group and summarize their responses. Evidence identified from the above pathways,  
48  
49 306 along with information from GAP I and GAP II will be summarized and taken into  
50  
51 307 account when developing the extension document.  
52  
53  
54  
55

56 308

57 309 *Consensus meeting*  
58  
59  
60

1  
2  
3 310 Following the Delphi process, the executive group will meet to discuss the findings  
4  
5 311 and compose the first draft of the extension document. We will present new items  
6  
7  
8 312 that will be identified through the Delphi exercise and the qualitative synthesis, and  
9  
10 313 discuss their plausibility and possible inclusion in the instrument. Similarly, items to  
11  
12  
13 314 be excluded with the respective rationale will be discussed. The group will finalize  
14  
15 315 the extension document by ordering and allocating items into domains.

16  
17  
18 316 The executive group will hold a further meeting with the advisory group that  
19  
20 317 is comprised of journal editors and representatives of surgical associations to discuss  
21  
22 318 dissemination and implementation processes of the developed extension  
23  
24 319 instrument.

25  
26  
27  
28 320

29  
30 321 *Pilot-testing and assessment of internal validity*

31  
32 322 The extension instrument will be pilot-tested by 2 members of the executive group.  
33  
34 323 One member will apply the instrument on the surgical guidelines which were  
35  
36 324 identified by the structured search process as described in GAP I<sup>22</sup> and on additional  
37  
38 325 guidelines that will be identified by extending the search to the present date. A  
39  
40 326 second member will independently follow the same process in a randomly selected  
41  
42 327 sample of 15 guidelines. The biostatistical team will assess the internal validity by  
43  
44 328 applying the statistical models of GAP II. Any difficulties encountered with the use of  
45  
46 329 the instrument will be documented and addressed. Results of the statistical  
47  
48 330 assessment will be appraised against statistical findings of the appraisal of the  
49  
50 331 original AGREE II instrument (GAP II).

51  
52  
53  
54 332

55  
56  
57  
58  
59 333 *AGREE II Extension Statement*  
60

1  
2  
3 334 The extension statement along with an explanation and elaboration (E&E) document  
4  
5 335 will be composed by the executive group. The E&E document will detail the use of  
6  
7  
8 336 the extension instrument in developing and reporting a new surgical guideline and  
9  
10 337 appraising an existing surgical guideline.

11  
12  
13 338

14  
15 339 *AGREE II Extension Checklist*

16  
17  
18 340 A checklist including the AGREE II Extension items will be developed with the aim of  
19  
20 341 this checklist to be used by guideline developers (to summarize development and  
21  
22 342 reporting parameters), guideline users (to appraise quality), peer reviewers and  
23  
24 343 journal editors (to assess adequacy of reporting parameters).<sup>27</sup>

25  
26  
27 344

28  
29  
30 345 *Feedback and criticism*

31  
32 346 We will invite constructive feedback on the instrument through the dedicated  
33  
34 347 website (<https://gap-project.org>) and we will consider comments in letters to the  
35  
36 348 editor and via the social media. An ad hoc team will collect and summarize the  
37  
38 349 feedback received in 3-monthly intervals for the first year after publication, and the  
39  
40 350 executive group will discuss and address this information in web-based meetings.

41  
42  
43 351

44  
45  
46 352 *Monitoring, update and future steps*

47  
48  
49 353 The executive group will monitor the use of the extension document and appraise its  
50  
51 354 applicability in surgical guidelines for a reasonable period of time after dissemination  
52  
53 355 and will publish their findings. Following consideration of the outcomes, feedback,  
54  
55 356 criticism, suggestions and new evidence in the field, we will discuss the need for an  
56  
57 357 update. The development of further extension instruments for national surgical  
58  
59  
60

1  
2  
3 358 guidelines and guidelines in distinct surgical or other interventional disciplines will be  
4  
5  
6 359 considered following discussions with key stakeholders.  
7

8 360

9  
10 361 *Implications for practice and research*

11  
12 362 Clinical practice guidelines directly impact clinical practice and healthcare delivery  
13  
14  
15 363 and, as such, development must follow rigorous methodological and reporting  
16  
17  
18 364 standards. The AGREE II instrument has been designed as a generic tool for  
19  
20 365 development and appraisal of clinical practice guidelines.<sup>6</sup> It is not intended to  
21  
22 366 substitute established detailed guidance on guideline development principles,  
23  
24  
25 367 processes and procedures, such as the GRADE approach.<sup>15</sup> It has addressed a vital  
26  
27  
28 368 need to summarize and detail essential development steps and reporting  
29  
30 369 parameters for high quality guidelines. Furthermore, as an appraisal instrument, it  
31  
32 370 may be used by healthcare practitioners, policymakers and other stakeholders to  
33  
34  
35 371 inform decisions regarding the use of an existing guideline.

36  
37 372 In addition, AGREE II has been shown to be a valuable tool for assessment of  
38  
39  
40 373 guideline quality in several clinical disciplines and evidence  
41  
42 374 fields.<sup>22,28,29,30,31,32,33,34,35,36</sup> Such summaries alert the scientific community to the  
43  
44  
45 375 need for improving specific aspects of clinical practice guidelines (corresponding to  
46  
47 376 the instrument domains) or the overall quality of guidelines. Our previous research  
48  
49  
50 377 has highlighted the need for improvement of the quality of surgical guidelines.<sup>22</sup> An  
51  
52 378 AGREE II extension for surgical guidelines is expected to meet this need.

53  
54 379 The outcome of this project will be the first AGREE II extension document.  
55  
56  
57 380 RIGHT (Reporting Tool for Practice Guidelines in Health Care) is another reporting  
58  
59 381 instrument for clinical practice guidelines.<sup>37</sup> We are aware of a planned RIGHT  
60



1  
2  
3 382 extension for public versions of guidelines and a RIGHT extension for adapted  
4  
5 383 practice guidelines.<sup>38,39</sup> An extension document of RIGHT for surgical guidelines  
6  
7  
8 384 would be justified as well. However, in view of the evidenced gap in methodological  
9  
10 385 quality of surgical guidelines,<sup>22</sup> we considered more appropriate to elaborate on  
11  
12  
13 386 AGREE II, as it addresses guideline development, reporting and appraisal.

14  
15 387

16  
17  
18 388 *Strengths and limitations*

19  
20 389 This tripartite project is the first to employ statistical models to inform the validity of  
21  
22 390 an extension, modification or update document on guidelines reporting. We will  
23  
24 391 correlate statistical findings with conceptual considerations of the need for  
25  
26 392 adjustments/extension of the AGREE II instrument. The project methods group has  
27  
28 393 adopted recommendations on developing research reporting guidelines, proposed  
29  
30 394 by a collaborative team who have developed a significant number of such  
31  
32 395 guidelines.<sup>21</sup> The holistic approach to developing an extension document for clinical  
33  
34 396 practice guidelines in surgery is reflected in the diverse scientific, cultural and  
35  
36 397 geographical background of experts in the field involved in the project. Similarly, the  
37  
38 398 Delphi panel will include stakeholders and members from a variety of backgrounds  
39  
40 399 including clinicians/surgeons, methodologists, guideline developers, policy makers  
41  
42 400 and the public (patient representatives).

43  
44 401 A face-to-face meeting of Delphi participants, instead of a full web-based  
45  
46 402 Delphi process, might be more efficacious in developing the extension document  
47  
48 403 allowing direct exchange of opinions, information and ideas. We will encourage a full  
49  
50 404 participation and exchange of information by developing a user-friendly and  
51  
52 405 interaction-allowing web-based platform. Furthermore, we will incentivize

1  
2  
3 406 participation and engagement of potential Delphi members by proposing group  
4  
5 407 authorship and participation in future associated projects.  
6  
7  
8 408

9  
10 409 **ETHICS AND DISSEMINATION**

11  
12  
13 410 Research Ethics Committee and Health Research Authority approval was waived,  
14  
15 411 since this is a professional staff study only and no duty of care lies with the NHS  
16  
17 412 (National Health Service) to any of the participants. We will request electronic  
18  
19 413 informed consent from Delphi participants and the responses of the Delphi members  
20  
21 414 will be anonymized.  
22  
23  
24

25 415 We have obtained conflict of interest forms of all executive group members  
26  
27 416 and will request electronic and/or written informed consent by Delphi participants  
28  
29 417 and members of the advisory group. We will deal with potential conflicts of interest  
30  
31 418 by re-assigning functions or replacing participants who pose interest conflict.  
32  
33  
34

35 419 We will submit the final paper with the extension document to be considered  
36  
37 420 for publication in the UEG Journal and Surgical Endoscopy, as defined in the  
38  
39 421 respective pre-development agreements. We will negotiate simultaneous  
40  
41 422 publications in other surgical journals for widest dissemination as recommended by  
42  
43 423 the Guidance for Developers of Health Research Reporting Guidelines.<sup>21</sup>  
44  
45  
46

47 424 We will make the extension document available in a dedicated website with  
48  
49 425 links to the original publications. We will encourage surgical organizations with  
50  
51 426 guideline development activities to use the instrument. We will further pursue  
52  
53 427 dissemination through the websites of the funding bodies and channels of social  
54  
55 428 media of major stakeholders, such as the Guideline International Network, GRADE  
56  
57 429 and EQUATOR.  
58  
59  
60

1  
2  
3 430 Through direct contact, we will advise international surgical and guideline  
4  
5  
6 431 development organizations, and policymakers to endorse the extension instrument.  
7  
8 432 Furthermore, editors of surgical journals will be advised to provide an extension  
9  
10 433 instrument checklist that authors of clinical practice guidelines should submit along  
11  
12  
13 434 with the original manuscript.

14  
15 435

16  
17  
18 436 The GAP III study aims to address the need for improvement of the methodology,  
19  
20 437 reporting and appraisal of surgical guidelines. An extension document specifically  
21  
22 438 designed for clinical practice guidelines in surgery will further improve the value, use  
23  
24  
25 439 and applicability of the AGREE II instrument in the surgical field with the ultimate  
26  
27 440 goal of enhancing patient care, experience and outcomes.

28  
29  
30 441

31  
32 442 **ACKNOWLEDGEMENTS**

33  
34  
35 443 The authors wish to thank Mrs. Meropi Gioumidou for the tireless contribution and  
36  
37 444 the excellent administrative support to the project.

38  
39  
40 445

41  
42 446 **AUTHOR CONTRIBUTION STATEMENT**

43  
44  
45 447 George A. Antoniou: Conception and design, interpretation of data, drafting the  
46  
47 448 work, final approval for the work to be published, agreement to be accountable for  
48  
49 449 all aspects of the work in ensuring that questions related to the accuracy or integrity  
50  
51 450 of any part of the work are appropriately investigated and resolved.

52  
53  
54 451 Dimitris Mavridis: Conception and design, analysis of data, interpretation of data,  
55  
56 452 drafting the work, final approval for the work to be published, agreement to be  
57  
58  
59 453 accountable for all aspects of the work in ensuring that questions related to the  
60

1  
2  
3 454 accuracy or integrity of any part of the work are appropriately investigated and  
4  
5  
6 455 resolved.

7  
8 456 Sofia Tsokani: Analysis of data, interpretation of data, revising the work critically for  
9  
10 457 important intellectual data, final approval for the work to be published, agreement  
11  
12  
13 458 to be accountable for all aspects of the work in ensuring that questions related to  
14  
15 459 the accuracy or integrity of any part of the work are appropriately investigated and  
16  
17 460 resolved.

18  
19  
20 461 Manuel López-Cano: Acquisition of data, analysis of data, interpretation of data,  
21  
22 462 revising the work critically for important intellectual data, final approval for the work  
23  
24 463 to be published, agreement to be accountable for all aspects of the work in ensuring  
25  
26 464 that questions related to the accuracy or integrity of any part of the work are  
27  
28 465 appropriately investigated and resolved.

29  
30  
31 466 Iván Flórez: Conception and design, interpretation of data, drafting the work, final  
32  
33 467 approval for the work to be published, agreement to be accountable for all aspects  
34  
35 468 of the work in ensuring that questions related to the accuracy or integrity of any part  
36  
37 469 of the work are appropriately investigated and resolved.

38  
39  
40 470 Melissa Brouwers: Conception and design, interpretation of data, revising the work  
41  
42 471 critically for important intellectual data, final approval for the work to be published,  
43  
44 472 agreement to be accountable for all aspects of the work in ensuring that questions  
45  
46 473 related to the accuracy or integrity of any part of the work are appropriately  
47  
48 474 investigated and resolved.

49  
50  
51 475 Sheraz Markar: Interpretation of data, revising the work critically for important  
52  
53 476 intellectual data, final approval for the work to be published, agreement to be  
54  
55 477 accountable for all aspects of the work in ensuring that questions related to the  
56  
57  
58  
59  
60

1  
2  
3 478 accuracy or integrity of any part of the work are appropriately investigated and  
4  
5  
6 479 resolved.

7  
8 480 Gianfranco Silecchia: Interpretation of data, revising the work critically for important  
9  
10 481 intellectual data, final approval for the work to be published, agreement to be  
11  
12  
13 482 accountable for all aspects of the work in ensuring that questions related to the  
14  
15 483 accuracy or integrity of any part of the work are appropriately investigated and  
16  
17  
18 484 resolved.

19  
20 485 Nader K Francis: Interpretation of data, revising the work critically for important  
21  
22 486 intellectual data, final approval for the work to be published, agreement to be  
23  
24  
25 487 accountable for all aspects of the work in ensuring that questions related to the  
26  
27  
28 488 accuracy or integrity of any part of the work are appropriately investigated and  
29  
30  
31 489 resolved.

32  
33 490 Stavros A. Antoniou: Conception and design, acquisition of data, analysis of data,  
34  
35 491 interpretation of data, drafting the work, final approval for the work to be published,  
36  
37  
38 492 agreement to be accountable for all aspects of the work in ensuring that questions  
39  
40  
41 493 related to the accuracy or integrity of any part of the work are appropriately  
42  
43  
44 494 investigated and resolved.

45 495

46  
47 496

48  
49 497

50  
51 498

52  
53 499

54  
55 500

56  
57 501

1  
2  
3 502  
45 503  
6  
78 504 **REFERENCES**  
9

10 505 1. Djulbegovic B, Guyatt GH. Progress in evidence-based medicine: a quarter  
11 century on. *Lancet*. 2017. doi:10.1016/S0140-6736(16)31592-6  
12 506

13 507 2. PubMed.  
14

15 508 3. Graham R, Mancher M, Wolman DM, Greenfield S, Steinberg E. *Clinical*  
16 *Practice Guidelines We Can Trust.*; 2011. doi:10.17226/13058  
17 509

18 510 4. Altman DG, Simera I, Hoey J, Moher D, Schulz K. EQUATOR: reporting  
19 guidelines for health research. *Lancet*. 2008;371(9619):1149-1150.  
20 511

21 512 doi:10.1016/S0140-6736(08)60505-X  
22

23 513 5. Equator. Equator-network.org. Equator Resource Centre.  
24

25 514 6. Brouwers MC, Kho ME, Browman GP, et al. AGREE II: Advancing guideline  
26 development, reporting and evaluation in health care. *J Clin Epidemiol*.  
27 515

28 516 2010;63(12):1308-1311. doi:10.1016/j.jclinepi.2010.07.001  
29

30 517 7. World Health Organization. WHO Handbook for Guideline Development.  
31

32 518 [http://apps.who.int/iris/bitstream/10665/75146/1/9789241548441\\_eng.pdf](http://apps.who.int/iris/bitstream/10665/75146/1/9789241548441_eng.pdf).  
33

34 519 Published 2012. Accessed October 2, 2017.  
35

36 520 8. The guidelines manual | Guidance and guidelines | NICE.  
37

38 521 <https://www.nice.org.uk/process/pmg6/chapter/reviewing-the-evidence>.  
39

40 522 Accessed October 2, 2017.  
41

42 523 9. Antoniou SA, Agresta F, Garcia Alamino JM, et al. European Hernia Society  
43

44 524 guidelines on prevention and treatment of parastomal hernias. *Hernia*. 2017.  
45

46 525 doi:10.1007/s10029-017-1697-5  
47  
48  
49  
50  
51  
52  
53  
54  
55  
56  
57  
58  
59  
60

- 1  
2  
3 526 10. Muysoms FE, Antoniou SA, Bury K, et al. European Hernia Society guidelines  
4  
5 527 on the closure of abdominal wall incisions. *Hernia*. 2015;19(1).  
6  
7 528 doi:10.1007/s10029-014-1342-5  
8  
9  
10 529 11. Gorter RR, Eker HH, Gorter-Stam MAW, et al. Diagnosis and management of  
11  
12 530 acute appendicitis. EAES consensus development conference 2015. *Surg*  
13  
14 531 *Endosc*. 2016;30(11):4668-4690. doi:10.1007/s00464-016-5245-7  
15  
16  
17 532 12. López-Cano M, García-Alamino JM, Antoniou SA, et al. EHS clinical guidelines  
18  
19 533 on the management of the abdominal wall in the context of the open or burst  
20  
21 534 abdomen. *Hernia*. 2018;22(6):921-939. doi:10.1007/s10029-018-1818-9  
22  
23  
24 535 13. Morales-Conde S, Peeters A, Meyer YM, et al. European association for  
25  
26 536 endoscopic surgery (EAES) consensus statement on single-incision endoscopic  
27  
28 537 surgery. *Surg Endosc*. 2019;33(4):996-1019. doi:10.1007/s00464-019-06693-2  
29  
30  
31 538 14. Francis NK, Sylla P, Abou-Khalil M, et al. EAES and SAGES 2018 consensus  
32  
33 539 conference on acute diverticulitis management: evidence-based  
34  
35 540 recommendations for clinical practice. In: *Surgical Endoscopy*. ; 2019.  
36  
37 541 doi:10.1007/s00464-019-06882-z  
38  
39  
40 542 15. Schünemann H, Brożek J, Guyatt G, Oxman A. GRADE handbook for grading  
41  
42 543 quality of evidence and strength of recommendations. The GRADE Working  
43  
44 544 Group.  
45  
46 545 16. AGREE Next Steps Consortium (2009). The AGREE II Instrument [Electronic  
47  
48 546 version].  
49  
50 547 17. Prinja S, Nandi A, Horton S, Levin C, Laxminarayan R. Costs, Effectiveness, and  
51  
52 548 Cost-Effectiveness of Selected Surgical Procedures and Platforms. In: *Disease*  
53  
54 549 *Control Priorities, Third Edition (Volume 1): Essential Surgery*. ; 2015.  
55  
56  
57  
58  
59  
60

- 1  
2  
3 550 doi:10.1596/978-1-4648-0346-8\_ch18  
4  
5  
6 551 18. Jünger S, Payne SA, Brine J, Radbruch L, Brearley SG. Guidance on Conducting  
7  
8 552 and REporting DElphi Studies (CREDES) in palliative care: Recommendations  
9  
10 553 based on a methodological systematic review. *Palliat Med.* 2017.  
11  
12 554 doi:10.1177/0269216317690685  
13  
14  
15 555 19. Choi J, Choi TY, Jun JH, Lee JA, Lee MS. Preferred Reporting Items for the  
16  
17 556 Development of Evidence-based Clinical Practice Guidelines in Traditional  
18  
19 557 Medicine (PRIDE-CPG-TM): Explanation and elaboration. *Eur J Integr Med.*  
20  
21 558 2016. doi:10.1016/j.eujim.2016.07.027  
22  
23  
24 559 20. Norris SL, Meerpohl JJ, Akl EA, Schünemann HJ, Chen Y, Whittington C. The  
25  
26 560 skills and experience of GRADE methodologists can be assessed with a simple  
27  
28 561 tool. *J Clin Epidemiol.* 2016. doi:10.1016/j.jclinepi.2016.07.001  
29  
30  
31 562 21. Moher D, Schulz KF, Simera I, Altman DG. Guidance for developers of health  
32  
33 563 research reporting guidelines. *PLoS Med.* 2010.  
34  
35 564 doi:10.1371/journal.pmed.1000217  
36  
37  
38 565 22. Antoniou SA, Tsokani S, Mavridis D, et al. Guideline Assessment Project: Filling  
39  
40 566 the GAP in Surgical Guidelines. *Ann Surg.* 2019;269(4):642-651.  
41  
42 567 doi:10.1097/SLA.0000000000003036  
43  
44  
45 568 23. Wong G, Greenhalgh T, Westhrop G, Pawson R. Development of  
46  
47 569 methodological guidance, publication standards and training materials for  
48  
49 570 realist and meta-narrative reviews: The RAMESES (Realist And Meta-narrative  
50  
51 571 Evidence Syntheses: Evolving Standards) project. *Health Serv Deliv*  
52  
53 572 *Res*2014;2(30)  
54  
55  
56 573 24. Pawson R. Evidence-Based Policy. SAGE Publications Ltd. London, 2006.  
57  
58  
59  
60



- 1  
2  
3 574 25. Pawson R, Greenhalgh T, Harvey G, Walshe K. Realist review--a new method  
4  
5 575 of systematic review designed for complex policy interventions. *J Health Serv*  
6  
7 576 *Res Policy*. 2005 Jul;10 Suppl 1:21-34.
- 8  
9  
10 577 26. Wong G, Greenhalgh T, Pawson R. Internet-based medical education: a realist  
11  
12 578 review of what works, for whom and in what circumstances. *BMC Med Educ*.  
13  
14 579 2010 Feb 2;10:12. doi: 10.1186/1472-6920-10-12.
- 15  
16  
17 580 27. Brouwers MC, Kerkvliet K, Spithof K. The AGREE reporting checklist: A tool to  
18  
19 581 improve reporting of clinical practice guidelines. *BMJ*. 2016.  
20  
21 582 doi:10.1136/bmj.i1152
- 22  
23  
24 583 28. Chen Z, Hong Y, Liu N, Zhang Z. Quality of critical care clinical practice  
25  
26 584 guidelines: Assessment with AGREE II instrument. *J Clin Anesth*. 2018;51:40-  
27  
28 585 47. doi:10.1016/j.jclinane.2018.08.011
- 29  
30  
31 586 29. Bazzano AN, Green E, Madison A, Barton A, Gillispie V, Bazzano LAL.  
32  
33 587 Assessment of the quality and content of national and international guidelines  
34  
35 588 on hypertensive disorders of pregnancy using the AGREE II instrument. *BMJ*  
36  
37 589 *Open*. 2016. doi:10.1136/bmjopen-2015-009189
- 38  
39  
40 590 30. Armstrong JJ, Rodrigues IB, Wasiuta T, MacDermid JC. Quality assessment of  
41  
42 591 osteoporosis clinical practice guidelines for physical activity and safe  
43  
44 592 movement: an AGREE II appraisal. *Arch Osteoporos*. 2016.  
45  
46 593 doi:10.1007/s11657-016-0260-9
- 47  
48  
49 594 31. Sabharwal S, Patel NK, Gauher S, Holloway I, Athansiou T. High methodologic  
50  
51 595 quality but poor applicability: Assessment of the AAOS guidelines using the  
52  
53 596 AGREE II instrument. *Clin Orthop Relat Res*. 2014. doi:10.1007/s11999-014-  
54  
55 597 3530-0  
56  
57  
58  
59  
60

- 1  
2  
3 598 32. Huang TW, Lai JH, Wu MY, Chen SL, Wu CH, Tam KW. Systematic review of  
4  
5 599 clinical practice guidelines in the diagnosis and management of thyroid  
6  
7 600 nodules and cancer. *BMC Med.* 2013. doi:10.1186/1741-7015-11-191  
8  
9  
10 601 33. Wong JJ, Côté P, Sutton DA, et al. Clinical practice guidelines for the  
11  
12 602 noninvasive management of low back pain: A systematic review by the  
13  
14 603 Ontario Protocol for Traffic Injury Management (OPTIMa) Collaboration. *Eur J*  
15  
16 604 *Pain (United Kingdom).* 2017. doi:10.1002/ejp.931  
17  
18  
19  
20 605 34. Acuna SA, Huang JW, Scott AL, et al. Cancer Screening Recommendations for  
21  
22 606 Solid Organ Transplant Recipients: A Systematic Review of Clinical Practice  
23  
24 607 Guidelines. *Am J Transplant.* 2017. doi:10.1111/ajt.13978  
25  
26  
27  
28 608 35. van Dijk AH, de Reuver PR, Besselink MG, et al. Assessment of available  
29  
30 609 evidence in the management of gallbladder and bile duct stones: a systematic  
31  
32 610 review of international guidelines. *HPB.* 2017. doi:10.1016/j.hpb.2016.12.011  
33  
34  
35 611 36. Zeng M, Yi Q, Zeng L, et al. Quality of therapeutic drug monitoring (TDM)  
36  
37 612 guidelines is suboptimal: an evaluation using the AGREE II instrument. *J Clin*  
38  
39 613 *Epidemiol.* October 2019. doi:10.1016/j.jclinepi.2019.10.007  
40  
41  
42 614 37. Chen Y, Yang K, Marušić A, et al. A reporting tool for practice guidelines in  
43  
44 615 health care: The RIGHT statement. *Ann Intern Med.* 2017;166(2):128-132.  
45  
46 616 doi:10.7326/M16-1565  
47  
48  
49 617 38. Wang X, Zhou Q, Chen Y, et al. Protocol of reporting items for public versions  
50  
51 618 of guidelines: The Reporting Tool for Practice Guidelines in Health Care-public  
52  
53 619 versions of guidelines. *BMJ Open.* 2019. doi:10.1136/bmjopen-2018-023147  
54  
55  
56  
57 620 39. Song Y, Darzi A, Ballesteros M, et al. Extending the RIGHT statement for  
58  
59 621 reporting adapted practice guidelines in healthcare: the RIGHT-Ad@pt  
60

1  
2  
3 622 Checklist protocol. *BMJ Open*. 2019. doi:10.1136/bmjopen-2019-031767  
4  
5

6 623  
7

8 624 **FIGURE LEGEND**  
9

10 625 **Fig. 1:** Development steps of the Guideline Assessment Project with the ultimate  
11  
12  
13 626 objective to develop an AGREE II extension document for surgical guidelines  
14

15 627  
16

17 628  
18

19 629  
20

21 630  
22

23 631  
24

25 632  
26

27 633  
28

29 634  
30

31 635  
32

33 636  
34

35 637  
36

37 638  
38

39 639  
40

41 640  
42

43 641  
44

45 642  
46

47 643  
48

49 644  
50

51 645  
52  
53  
54  
55  
56  
57  
58  
59  
60

646

647

648 **Table 1.** Stakeholders to participate in a web-based Delphi process

649

| Function                                                                                                                                                                                                                                                                           |
|------------------------------------------------------------------------------------------------------------------------------------------------------------------------------------------------------------------------------------------------------------------------------------|
| General Surgeon                                                                                                                                                                                                                                                                    |
| Urologist                                                                                                                                                                                                                                                                          |
| Thoracic Surgeon                                                                                                                                                                                                                                                                   |
| Vascular Surgeon                                                                                                                                                                                                                                                                   |
| Pediatric Surgeon                                                                                                                                                                                                                                                                  |
| Journal Editor                                                                                                                                                                                                                                                                     |
| National authority representative                                                                                                                                                                                                                                                  |
| NICE representative                                                                                                                                                                                                                                                                |
| Guideline developer/Representative from Europe                                                                                                                                                                                                                                     |
| Guideline developer/Representative from North America                                                                                                                                                                                                                              |
| Guideline developer/Representative from Asia                                                                                                                                                                                                                                       |
| Guideline developer/Representative from middle-income country                                                                                                                                                                                                                      |
| Healthcare provider representative                                                                                                                                                                                                                                                 |
| Representative from GRADE                                                                                                                                                                                                                                                          |
| Guideline implementer                                                                                                                                                                                                                                                              |
| Patient representative                                                                                                                                                                                                                                                             |
| WHO representative                                                                                                                                                                                                                                                                 |
| European Commission representative                                                                                                                                                                                                                                                 |
| GIN representative                                                                                                                                                                                                                                                                 |
| EQUATOR representative                                                                                                                                                                                                                                                             |
| NICE: National Institute of Health and Care Excellence<br>GRADE: Grading of Recommendation Assessment, Development and Evaluation<br>WHO: World Health Organization<br>GIN: Guidelines International Network<br>EQUATOR: Enhancing the QUALity and Transparency Of health Research |

650

1  
2  
3  
4  
5  
6  
7  
8  
9  
10  
11  
12  
13  
14  
15  
16  
17  
18  
19  
20  
21  
22  
23  
24  
25  
26  
27  
28  
29  
30  
31  
32  
33  
34  
35  
36  
37  
38  
39  
40  
41  
42  
43  
44  
45  
46  
47  
48  
49  
50  
51  
52  
53  
54  
55  
56



## APPENDIX

## The AGREE II instrument

Adapted from: Brouwers MC, Kerkvliet K, Spithoff K. The AGREE Reporting Checklist: a tool to improve reporting of clinical practice guidelines. *BMJ*. 2016;i1152.

| Domains                     | Items                                                                                                         | Assessment* |
|-----------------------------|---------------------------------------------------------------------------------------------------------------|-------------|
| I. Scope and purpose        | 1. The overall objective(s) of the guideline is (are) specifically described.                                 | 1 to 7      |
|                             | 2. The health question(s) covered by the guideline is (are) specifically described.                           | 1 to 7      |
|                             | 3. The population (patients, public, etc.) to whom the guideline is meant to apply is specifically described. | 1 to 7      |
| II. Stakeholder involvement | 4. The guideline development group includes individuals from all relevant professional groups.                | 1 to 7      |
|                             | 5. The views and preferences of the target population (patients, public, etc.) have been sought.              | 1 to 7      |
|                             | 6. The target users of the guideline are clearly defined.                                                     | 1 to 7      |
| III. Rigor of development   | 7. Systematic methods were used to search for evidence.                                                       | 1 to 7      |
|                             | 8. The criteria for selecting the evidence are clearly described.                                             | 1 to 7      |
|                             | 9. The strengths and limitations of the body of evidence are clearly described.                               | 1 to 7      |
|                             | 10. The methods for formulating the recommendations are clearly described.                                    | 1 to 7      |
|                             | 11. The health benefits, side effects, and risks have been considered in formulating the recommendations.     | 1 to 7      |
|                             | 12. There is an explicit link between the recommendations and the supporting evidence.                        | 1 to 7      |
|                             | 13. The guideline has been externally reviewed by experts prior to its publication.                           | 1 to 7      |
|                             | 14. A procedure for updating the guideline is provided.                                                       | 1 to 7      |

|                                                  |                                                                                                     |                                                                                                          |
|--------------------------------------------------|-----------------------------------------------------------------------------------------------------|----------------------------------------------------------------------------------------------------------|
| IV. Clarity of presentation                      | 15. The recommendations are specific and unambiguous.                                               | 1 to 7                                                                                                   |
|                                                  | 16. The different options for management of the condition or health issue are clearly presented.    | 1 to 7                                                                                                   |
|                                                  | 17. Key recommendations are easily identifiable.                                                    | 1 to 7                                                                                                   |
| V. Applicability                                 | 18. The guideline describes facilitators and barriers to its application.                           | 1 to 7                                                                                                   |
|                                                  | 19. The guideline provides advice and/or tools on how the recommendations can be put into practice. | 1 to 7                                                                                                   |
|                                                  | 20. The potential resource implications of applying the recommendations have been considered.       | 1 to 7                                                                                                   |
|                                                  | 21. The guideline presents monitoring and/or auditing criteria.                                     | 1 to 7                                                                                                   |
| VI. Editorial independence                       | 22. The views of the funding body have not influenced the content of the guideline.                 | 1 to 7                                                                                                   |
|                                                  | 23. Competing interests of guideline development group members have been recorded and addressed.    | 1 to 7                                                                                                   |
| Overall guideline assessment                     | 24. Rate the overall quality of this guideline.                                                     | 1 to 7                                                                                                   |
|                                                  | 25. I would recommend this guideline for use.                                                       | <ul style="list-style-type: none"> <li>• Yes</li> <li>• Yes, with modifications</li> <li>• No</li> </ul> |
| * 7 corresponds to the highest possible quality. |                                                                                                     |                                                                                                          |
