# Supplementary material for: Protocol of an interdisciplinary consensus project aiming to develop an AGREE II extension for guidelines in surgery
Source: PubMed Central journal article supplement — BMJ Open. 2020 Aug 11;10(8):e037107. doi: 10.1136/bmjopen-2020-037107 (PMC7418673; doi:10.1136/bmjopen-2020-037107), 2020-08-11
Supplement: bmjopen-2020-037107supp001.pdf [file bmjopen-2020-037107supp001.pdf]

## APPENDIX

## The AGREE II instrument

Adapted from: Brouwers MC, Kerkvliet K, Spithoff K. The AGREE Reporting Checklist: a tool to improve reporting of clinical practice guidelines. *BMJ*. 2016;i1152.

| Domains                            | Items                                                                                                         | Assessment* |
|------------------------------------|---------------------------------------------------------------------------------------------------------------|-------------|
| <b>I. Scope and purpose</b>        | 1. The overall objective(s) of the guideline is (are) specifically described.                                 | 1 to 7      |
|                                    | 2. The health question(s) covered by the guideline is (are) specifically described.                           | 1 to 7      |
|                                    | 3. The population (patients, public, etc.) to whom the guideline is meant to apply is specifically described. | 1 to 7      |
| <b>II. Stakeholder involvement</b> | 4. The guideline development group includes individuals from all relevant professional groups.                | 1 to 7      |
|                                    | 5. The views and preferences of the target population (patients, public, etc.) have been sought.              | 1 to 7      |
|                                    | 6. The target users of the guideline are clearly defined.                                                     | 1 to 7      |
| <b>III. Rigor of development</b>   | 7. Systematic methods were used to search for evidence.                                                       | 1 to 7      |
|                                    | 8. The criteria for selecting the evidence are clearly described.                                             | 1 to 7      |
|                                    | 9. The strengths and limitations of the body of evidence are clearly described.                               | 1 to 7      |
|                                    | 10. The methods for formulating the recommendations are clearly described.                                    | 1 to 7      |
|                                    | 11. The health benefits, side effects, and risks have been considered in formulating the recommendations.     | 1 to 7      |
|                                    | 12. There is an explicit link between the recommendations and the supporting evidence.                        | 1 to 7      |
|                                    | 13. The guideline has been externally reviewed by experts prior to its publication.                           | 1 to 7      |
|                                    | 14. A procedure for updating the guideline is provided.                                                       | 1 to 7      |

|                                                  |                                                                                                     |                                                                                                          |
|--------------------------------------------------|-----------------------------------------------------------------------------------------------------|----------------------------------------------------------------------------------------------------------|
| <b>IV. Clarity of presentation</b>               | 15. The recommendations are specific and unambiguous.                                               | 1 to 7                                                                                                   |
|                                                  | 16. The different options for management of the condition or health issue are clearly presented.    | 1 to 7                                                                                                   |
|                                                  | 17. Key recommendations are easily identifiable.                                                    | 1 to 7                                                                                                   |
| <b>V. Applicability</b>                          | 18. The guideline describes facilitators and barriers to its application.                           | 1 to 7                                                                                                   |
|                                                  | 19. The guideline provides advice and/or tools on how the recommendations can be put into practice. | 1 to 7                                                                                                   |
|                                                  | 20. The potential resource implications of applying the recommendations have been considered.       | 1 to 7                                                                                                   |
|                                                  | 21. The guideline presents monitoring and/or auditing criteria.                                     | 1 to 7                                                                                                   |
| <b>VI. Editorial independence</b>                | 22. The views of the funding body have not influenced the content of the guideline.                 | 1 to 7                                                                                                   |
|                                                  | 23. Competing interests of guideline development group members have been recorded and addressed.    | 1 to 7                                                                                                   |
| <b>Overall guideline assessment</b>              | 24. Rate the overall quality of this guideline.                                                     | 1 to 7                                                                                                   |
|                                                  | 25. I would recommend this guideline for use.                                                       | <ul style="list-style-type: none"> <li>• Yes</li> <li>• Yes, with modifications</li> <li>• No</li> </ul> |
| * 7 corresponds to the highest possible quality. |                                                                                                     |                                                                                                          |
